20 ABSTRACT

21 Little is known about the relative contributions of selective and neutral forces on human-  
22 associated microbiota assembly. Here, we characterize microbial community assembly in 52  
23 Tsimane infant-mother pairs, using longitudinally collected stool and tongue swab samples  
24 profiled with 16S rRNA gene amplicon sequencing. The Tsimane are an indigenous Bolivian  
25 population who practice infant care associated behaviors expected to increase mother-infant  
26 dispersal. Infant consumption of dairy products, vegetables, and chicha (a fermented drink  
27 inoculated with oral microbes) was significantly associated with gut microbiota composition. At  
28 both body sites, maternal microbes at higher relative abundance were more likely to be shared.  
29 Shared microbes were also higher in abundance in infants at both body sites, but decreased in  
30 average relative abundance with age and were not significantly higher by 12 months of age.  
31 Infant microbiotas were modeled using a neutral community model of assembly, which showed  
32 that the prevalence of more than two thirds of infant-colonizing microbes could be explained  
33 using neutral processes alone. The same method was applied to datasets from Finnish and  
34 Bangladeshi infants, confirming that the majority of microbes colonizing infants from different  
35 countries were neutrally distributed. Among the Tsimane infant and adult gut microbiota  
36 samples, neutral processes were less prominent in villages with more market access. These  
37 results underscore the importance of neutral processes during infant microbiota assembly, and  
38 suggest that cultural changes associated with market integration may be affecting traditional  
39 modes of microbiota assembly by decreasing the role of these neutral processes, perhaps  
40 through changes in diet, sanitation, or access to medical care.

41           The human body becomes colonized in early life by microbial communities that are  
42 involved in several key metabolic and immunologic processes, including nutrient acquisition,  
43 immune programming, and pathogen exclusion. While these communities are relatively simple  
44 at birth, they grow in complexity until reaching an adult-like configuration within the first few  
45 years of life<sup>1,2</sup>. This rapid and dynamic period of community assembly is characterized by broad  
46 shifts in community structure<sup>3</sup> that arise from both deterministic processes like host-driven  
47 ecological selection<sup>4</sup>, as well as neutral processes like dispersal and demographic stochasticity<sup>5-</sup>  
48 <sup>7</sup>. Yet, the relative contributions of deterministic and neutral processes to early life microbiota  
49 assembly—and the extent to which different environmental factors may moderate these  
50 effects—remain largely unexplored.

51           In order to assess how transmission dynamics might affect community assembly, we  
52 focused on the Tsimane people, an indigenous forager-horticulturalist population inhabiting the  
53 Bolivian Amazon basin<sup>8</sup>. The Tsimane practice several infant care-associated behaviors  
54 (ICABs) that potentially increase the likelihood that maternally-derived microbes disperse to  
55 their offspring. For example, all Tsimane infants are vaginally birthed at home, and mothers  
56 carry infants in slings during the day and share their beds with their infants at night. Infants are  
57 breastfed ‘on demand’ 24 hours a day, and the period of exclusive breastfeeding lasts about 4  
58 months<sup>9,10</sup>, although typically, weaning is not complete until around 27 months of age<sup>9</sup>. During  
59 the introduction of complementary foods, mothers frequently pre-masticate, or pre-chew, foods  
60 such as rice, plantain, meat, or fish before depositing them into the mouths of their children. The  
61 most commonly consumed liquids are water (usually sourced from a nearby river), water mixed  
62 with sugar or fruit juice<sup>11</sup>, and chicha, a fermented drink made from manioc, corn, or plantain.  
63 Chicha made from manioc and corn is inoculated with saliva; women chew and expectorate  
64 pieces of manioc during preparation, and serve the drink without cooking. Similar chicha  
65 preparations have been shown to contain high loads of diverse lactic acid bacteria and yeast  
66 species<sup>12-16</sup>.

67           In comparison with industrialized societies, microbial exposure is high among the  
68 Tsimane. They lack access to improved water sources and have frequent exposure to parasites  
69 with high rates of early life morbidity and mortality owing to infectious disease<sup>17-19</sup>. Previous  
70 studies have reported that Tsimane children have high levels of C-reactive protein and other  
71 inflammatory markers, consistent with a high pathogen burden<sup>19-22</sup>. This confluence of high  
72 exposure to maternal and environmental sources of microbes and high immune system  
73 activation suggests high rates of microbial dispersal to Tsimane infants from family and  
74 environmental sources.

75           In recent years, rapid lifestyle changes have taken place in the Tsimane population due  
76 to increased access to market goods, cash economies, wage labor, education, and medicine<sup>8</sup>.  
77 These changes have not yet affected ICABs<sup>10</sup>, and the Tsimane continue to subsist primarily on  
78 horticulture and foraging, remain highly active, and exhibit negligible cardiometabolic health  
79 risks<sup>23</sup>. However, secular trends have documented increasing sedentarism, BMI, LDL  
80 cholesterol, and consumption of sugar, vegetable oil, and processed foods—particularly for  
81 Tsimane residing closer to market towns<sup>23-25</sup>. Thus, the Tsimane represent an important  
82 population in which to examine how changing lifestyle factors may affect patterns and  
83 processes of host-associated microbiota assembly.

84           Here, we report on microbiota data that we generated as part of a long-term study of  
85 Tsimane health and life history<sup>8</sup>. We first examined microbiota structure from paired fecal (n =  
86 288) and oral (n = 119) samples collected longitudinally from 52 Tsimane mother-infant dyads  
87 between 2012-2013, one of the largest sample collections of this type to date from a non-  
88 industrialized setting. We then placed the patterns of microbiota assembly that we observed into  
89 a global context by comparing Tsimane infants to previously studied infants from Bangladesh<sup>26</sup>  
90 and Finland<sup>27</sup>. Finally, we expanded our cohort by including data we generated from fecal  
91 samples collected in 2009 from 73 Tsimane individuals ranging in age from 1 to 58 years,  
92 enabling us to examine temporal and regional variation in microbiota composition associated

93 with market integration. We found that even though neutral processes could largely explain  
94 patterns of infant microbiota assembly, these patterns were also consistent with an effect of  
95 ICABs. Gut bacterial taxa were associated with increasing market integration, and displayed  
96 altered dispersal patterns during infant colonization.

97

## 98 RESULTS

99 To explore how ICABs affect patterns of microbial colonization in young children, stool  
100 samples (reflecting the distal gut) and swab samples from the dorsum of the tongue were  
101 collected from 52 Tsimane families living in six villages located along the Maniqui River in the  
102 Bolivian lowlands of the Amazon basin. Samples were collected from 48 infants (0-2 years of  
103 age) and 51 mothers (14 or more years of age) using a mixed longitudinal design  
104 (**Supplementary Table 1** and **Fig. 1a**). Bacterial communities in these samples were profiled  
105 using 16S rRNA gene amplicon sequencing. Anthropometric measures, as well as health and  
106 diet surveys, were also collected at the time of sampling<sup>8</sup>.

107

### 108 *Infant and Maternal Microbiota Dynamics Following Birth*

109 Bacterial diversity increased with age in both the distal gut and tongue dorsum of infants  
110 over the first 18 months of life (**Fig. 1b,c**). In a linear mixed-effects model that included the  
111 subject as a random effect, diversity was significantly positively correlated with age in both stool  
112 ( $p < 0.001$ , conditional  $R^2 = 0.481$ ) and tongue swabs ( $p = 0.015$ , conditional  $R^2 = 0.38$ ),  
113 although diversity increased at a faster rate in the stool samples (**Fig. 1b,c**; ANOVA,  $p = 0.004$ ).  
114 Maternal stool samples decreased in diversity over the study period (**Fig. 1b**,  $p = 0.04$ ,  
115 conditional  $R^2 = 0.348$ ), which is consistent with other studies of the gut microbiota of women in  
116 the early postpartum period<sup>28</sup>. The diversity of the maternal dorsal tongue communities was  
117 stable during this time (**Fig. 1c**,  $p = 0.105$ ).

118 Variation in bacterial community composition among samples from mothers and infants  
119 was primarily explained by body site (14%, PERMANOVA,  $p < 0.001$ ) and host age (11%,  
120 PERMANOVA,  $p < 0.001$ ). Village type (proximal or distal to the regional market) was also a  
121 significant factor (PERMANOVA,  $p < 0.01$ ), although it explained less than 0.5% of the variation.  
122 Microbial communities colonizing the infant gut and tongue were distinct at all ages and became  
123 increasingly differentiated with time (**Fig. 1d** and **Supplementary Fig. 1**), but were never as  
124 distinct as those of adults, owing largely to incomplete maturation of these infant distal gut  
125 microbiotas by 18 months of age. The tongue swabs of 16-18 month olds harbored microbial  
126 communities similar in composition to adult tongue swabs (**Fig. 1d**), which contrasts with the  
127 findings of a previous cross-sectional study showing that the oral microbiota of Tsimane infants  
128 (9-24 months old) was distinct from that of their mothers<sup>29</sup>. The number of amplicon sequence  
129 variants (ASVs) shared between body sites within infants was highest immediately after birth  
130 (33.3%), and then declined with time (**Supplementary Fig. 1**). However, the ASV overlap  
131 between body sites in 16-18 month olds was significantly higher than in adults (**Supplementary**  
132 **Fig. 1**, Wilcoxon rank-sum test,  $p = 0.03$ ).

133 Previous studies have reported a high prevalence of stunting and underweight in  
134 Tsimane children older than 2 years, but low prevalence of undernutrition<sup>30</sup>. Within the current  
135 study cohort of 48 Tsimane children, only one subject consistently exhibited height-for-age  
136 (HAZ) and weight-for-age (WAZ) z-scores more than 2 SD below the mean. Five other subjects  
137 had HAZ or WAZ scores that crossed from greater than to less than -2 SD after one year of age.  
138 All infants in the longitudinal cohort were breastfeeding at all study time points. However, among  
139 non-exclusively breastfed infants over 6 months of age, 63.8% of samples were collected at  
140 times when the infant had a minimum dietary diversity (MDD) score of  $<4$  (**Supplementary Fig.**  
141 **2a**), indicating potential micronutrient inadequacy in their complementary foods<sup>31</sup>. MDD is based  
142 on the 24-hour dietary recall of 7 key food groups, including grains, roots and tubers; legumes  
143 and nuts; dairy products (milk, yogurt, cheese); flesh foods (meat, fish, poultry and liver/organ

144 meats); eggs; vitamin-A rich fruits and vegetables; and other fruits and vegetables. The infants'  
145 MDD scores were positively correlated with infant gut diversity (**Supplementary Fig. 2a**,  $p =$   
146  $0.027$ , conditional  $R^2 = 0.324$ ), and accounted for a larger effect than age ( $\beta_{\text{MDD}} = 1.2$  vs.  $\beta_{\text{Age}}$   
147  $(\text{months}) = 0.6$ ,  $p < 0.05$  for both) on infant gut diversity. Chicha consumption, as well as vegetable  
148 and dairy consumption, was significantly associated with gut microbiota composition, even after  
149 controlling for age and village (**Fig. 1e**, partial CCA, ANOVA with 999 permutations,  $p < 0.05$ ).  
150 Interestingly, consuming chicha made from manioc or corn had an opposite association with the  
151 infant gut microbiota than did consuming manioc or corn itself. In contrast to dietary factors,  
152 fecal neopterin, a marker of interferon-activated monocytes and macrophages, and of intestinal  
153 inflammation<sup>32</sup>, was associated with significantly lower infant gut diversity, even when controlling  
154 for age (**Supplementary Fig. 2b**,  $p = 0.002$ , conditional  $R^2 = 0.333$ ).

155

#### 156 *Sources of Infant-Colonizing Microbes*

157 To identify potential sources of infant-colonizing microbes, we first quantified the overlap  
158 between infant and adult microbiotas. 84.3% of the ASVs found in all infant stool samples at all  
159 time points were also found in at least one adult stool sample, while 79.9% of infant oral ASVs  
160 were also found in at least one adult oral sample. On average, about half of the microbes  
161 colonizing an infant's gut or tongue were also found in their mother's samples from the same  
162 body site, and this percentage increased as the infant aged (**Supplementary Fig. 3a**, blue line  
163 plus green line). However, the vast majority of these shared microbes were also found in other  
164 adults living in the same village as the infant (**Supplementary Fig. 3a**, green line), reflecting a  
165 high degree of microbial sharing among nearby adults, similar to that observed in other  
166 indigenous populations<sup>33</sup>. Mothers from the same village shared significantly more gut microbes,  
167 but not more oral microbes, than did mothers from different villages (**Supplementary Fig. 3b**,  
168 Wilcoxon rank-sum test,  $p < 0.001$ ), suggesting that village ecology might play a role in  
169 structuring the gut microbiota. About half of the microbes found in an infant's gut were found in

170 at least one of their mother's stool samples (**Supplementary Fig. 3c**, purple line plus green  
171 line), and about half were not found in any of their mother's samples (orange line), with very few  
172 infant gut microbes ever observed on their mother's tongue (yellow line). The same was true for  
173 infant tongue microbes, of which the majority of infant oral ASVs were observed on their  
174 mother's tongue (**Supplementary Fig. 3c**, yellow line) and very few were observed in their  
175 mother's gut (orange line).

176 Even though they accounted for only about half of the taxa in the infant distal gut and  
177 tongue dorsum, the bacteria shared within a mother-infant dyad were found at higher relative  
178 abundances in both the infants and their mothers than non-shared taxa. This difference in  
179 average relative abundance was statistically significant until the infants reached about 12  
180 months of age, after which the relative abundances of shared and non-shared taxa did not  
181 significantly differ (**Fig. 2a,c**). At both body sites, the frequency at which a given microbe was  
182 shared within a dyad was largely a function of its relative abundance in the mother. Microbes  
183 with an average maternal abundance >0.1% were shared within a dyad at the same rate as its  
184 prevalence, while microbes at 0.01% or lower abundance in mothers were almost never shared  
185 within a dyad, even if the ASV was highly prevalent in infants (**Fig. 2b,d**). Overall, microbes that  
186 were highly abundant in Tsimane mothers were more likely to be shared with their infants.

187

### 188 *Microbiota Assembly Rules*

189 Since many Tsimane ICABs may increase the opportunity for neutral dispersal of  
190 microbes from mothers to their children, we sought to quantify the relative contributions of  
191 deterministic and stochastic (*i.e.* neutral) processes during microbiota assembly. We used the  
192 neutral community model (NCM)<sup>34</sup>, which has previously been applied to the assembly of many  
193 host-associated microbial communities<sup>6,7</sup>, to address this issue. The NCM predicts the  
194 prevalence of each microbe given its average relative abundance in a regional species pool.  
195 Microbes that fit those predictions are inferred to be assembling neutrally, while microbes at



196 higher or lower prevalence are inferred to be under positive or negative ecological selection,  
197 respectively. The NCM assumes that all microbes in a regional species pool have an equal per  
198 capita ability to disperse to a local area, and once established, to have equal per capita fitness,  
199 growth, and death rates<sup>34</sup>.

200 The regional species pool was defined as containing all of the microbes able to disperse  
201 to and colonize a local area, which in this case was the infant gut or tongue. We estimated the  
202 composition of this pool by summing all of the local communities observed at a body site in all of  
203 the infants in the cohort (*i.e.*, the 'infant pool'). However, since we were also interested in the  
204 role that maternal microbes play in infant microbiota assembly, we assessed the degree to  
205 which the maternal microbiota contributed to the regional species pool by calculating the NCM  
206 goodness of fit (generalized  $R^2$ ) when maternal samples from the same body site were used  
207 instead to estimate the regional species pool (*i.e.*, the 'mother pool'). An  $R^2$  value close to 1  
208 would imply that the composition of the infant gut microbiota was consistent with neutral  
209 dispersal, while a poor fit (*i.e.*,  $R^2$  close to 0 or negative) would indicate that community  
210 assembly was due to more than just neutral dispersal. In this way, the NCM served as a useful  
211 mechanistic null model to help identify factors leading to a divergence from neutral dynamics or  
212 specific taxa that assembled in a non-neutral manner, such as strong competitors or active  
213 colonizers.

214 We found that microbes in the infant gut fit the neutral model moderately well when  
215 using the infant pool (**Fig. 3a**,  $R^2 = 0.38$ ), and that approximately two-thirds were neutrally  
216 distributed, while 27.9% experienced positive selection. Only 5.3% experienced negative  
217 selection; they included obligate anaerobes such as *Megasphaera*, *Prevotella*, *Bifidobacterium*,  
218 *Bacteroides*, and *Libanicoccus*, suggesting that oxygen exposure could be an impediment to  
219 transmission (**Fig. 3a**). Conversely, use of the mother pool resulted in a poorer model fit ( $R^2 = -$   
220 0.29), indicating that infant-colonizing maternal microbes were under either positive or negative  
221 selection (**Fig. 3a**). Four microbes that were highly abundant and prevalent in the infant gut,

222 *Escherichia/Shigella* sp. (ASV 6812), *Bifidobacterium* sp. (ASV 4271), *Veillonella atypica* or *V.*  
223 *dispar* (ASV 4083), and *Streptococcus* sp. (ASV 3537), were much less prevalent in the  
224 maternal gut (**Fig. 3b**). Conversely, two *Prevotella* spp. ASVs (5359 and 5371) were much less  
225 prevalent in the infant gut than the adult gut, especially in early life (**Fig. 3b**).

226 The NCM using the infant tongue swab pool predicted the distribution of infant oral  
227 microbes well, as the majority of these taxa assembled according to neutral expectations (Fig.  
228 3c,  $R^2 = 0.69$ ). Interestingly, the model still fit relatively well using the mother tongue swab pool  
229 (Fig. 3c,  $R^2 = 0.19$ ), indicating that neutral mother-to-infant dispersal may play a more important  
230 role during assembly of the infant oral microbiota than the gut microbiota. *Streptococcus* spp.  
231 (ASVs 3524, 3522, and 3537), *Granulicatella adiacens* or *G. para-adiacens* (ASV 3641), and  
232 *Veillonella* sp. (ASV 4083) were all highly prevalent in both infant and mother tongue swabs.  
233 Two of these ASVs (4083 and 3537) were highly prevalent in the infant gut but not the adult gut,  
234 suggesting that a small number of bacterial taxa may disperse from the adult mouth to the infant  
235 gut and mouth.

236

### 237 *Infant Microbiota Assembly in a Global Context*

238 We next sought to determine whether the assembly patterns that we observed in the  
239 Tsimane were conserved in infants from diverse cultures. We integrated our data with two  
240 publicly available datasets generated with comparable molecular methods for profiling the distal  
241 gut microbiota. The first of these datasets was created in a study of undernourished infants in  
242 Bangladesh<sup>26</sup> (we used the well-nourished control group only), and the second in a large  
243 observational study of type 2 diabetes in eastern Europe<sup>27</sup> (we used the Finnish infants only).  
244 Since the European study did not include samples from adults, we also included gut microbiota  
245 data from British adults to approximate the microbiota structure of a typical European, high-  
246 income country<sup>35</sup>. Despite drastically different social and physical environments, access to  
247 health care, and diets, the distal gut microbiota of the infants in these three studies were similar

248 in composition at the earliest ages based on their Jaccard distance, indicating similar initial  
249 microbial colonists in societies across the globe (**Fig. 4a**). A principal curve was fit to each  
250 dataset, representing the average trajectory of microbiota composition across time in infants  
251 from that country. The age ranges for each infant cohort were 0.2 – 19.3 months for Bolivia  
252 (Tsimane), 0 – 24.2 months for Bangladesh, and 1.2 – 36.9 months for Finland. As the children  
253 became older, their microbiota trajectories diverged, and their microbiotas became more distinct  
254 as they approached a population-specific adult-like state (**Fig. 4a**). By scaling the principal curve  
255 position to the mean of the adult samples, and then regressing against the age of the subject we  
256 found that infant microbiotas from these three countries matured, or reached an average adult-  
257 like state, at significantly different rates (ANOVA,  $p > 0.05$  for all pairwise comparisons)  
258 (**Supplementary Fig. 4**).

259 In order to determine if neutral processes operate in similar manners among infants in  
260 different cultural settings and geographies, we divided each dataset into three-month age  
261 intervals up to one year of age, and then refit the NCM model using only the samples from that  
262 interval as the estimate of the regional species pool, building a total of 12 additional models  
263 (**Supplementary Fig. 5**). These datasets exhibited striking consistency in the role of neutral and  
264 non-neutral processes across both age and geography, with the majority of microbes exhibiting  
265 patterns of neutral assembly across individuals (**Fig. 4b**). Furthermore, by partitioning ASVs  
266 according to country, age group, and how well they fit the neutral model, we found similar sets  
267 of neutral and non-neutral microbes across geography and ontogeny (**Fig. 4c**, Jaccard  
268 distance/PCoA). A heatmap of only the microbes that were positively selected revealed three,  
269 *Bifidobacterium bifidum* (ASV 4264), *Bacteroides dorei* or *B. fragilis* (ASV 5620), and *Klebsiella*  
270 sp. (ASV 6788) as common in all three cohorts (**Fig. 4e**). Other country-specific patterns were  
271 also apparent, including a set of 6 *Bacteroides* ASVs (ASVs 5510, 5614, 5639, 5697, 5646, and  
272 5684) that were prevalent in Finnish and Bolivian (Tsimane), but not Bangladeshi infants, as  
273 well as two *Prevotella* ASVs (ASVs 5359 and 5371) that increased in prevalence with age in

274 both the Bolivian (Tsimane) and Bangladeshi infants, while remaining nearly absent in Finnish  
275 infants (**Fig. 4e**). Interestingly, *Bacteroides* and *Prevotella* have been identified as biomarkers  
276 for Western and non-Western lifestyles<sup>36</sup>, respectively, yet both were prevalent in Tsimane  
277 infants.

278 The neutral community model also predicts the probability that when an individual  
279 microbe is removed from the local community, it is replaced by a microbe dispersing from the  
280 regional species pool rather than by reproduction from within the local community<sup>7,34</sup>. This  
281 migration term,  $m$ , increased with age in all three populations, although it increased significantly  
282 more in the Tsimane infants (**Fig. 4d**). This significantly higher rate of microbial migration into  
283 the Tsimane infant gut is consistent with their high exposure to maternal and environmental  
284 microbes.

285

#### 286 *Market Access Influences Tsimane Microbiota Structure*

287 In recent decades, the Tsimane have experienced profound changes to their culture and  
288 life history, including increased access to processed foods in markets and greater access to  
289 modern medical care. In order to understand how these lifestyle shifts may have affected the  
290 assembly of the gut microbiota, we compared the gut microbiota structure of adults living in nine  
291 Tsimane villages. These villages belonged to three village ecotypes, 'proximal river', 'distal  
292 river', and 'forest', reflecting a gradient of cultural and lifestyle features currently in transition  
293 (**Supplementary Table 1** and **Fig. 5a**), such as higher intake of processed food<sup>24</sup>, increased  
294 obesity and metabolic syndrome<sup>37</sup>, and higher levels of urinary phthalates<sup>38</sup>, suggesting that  
295 increased economic integration and market access can have important health impacts. At the  
296 time of sample collection, proximal river villages ( $\leq 20$  km to market) were accessible by  
297 road/taxi or boat, whereas distal river villages ( $>20$  km to market) were only accessible by foot  
298 or boat (**Supplementary Table 1**). Samples from the two proximal and four distal river villages  
299 are those depicted in **Fig. 1a**. In addition, we included a single stool sample from each of 73

300 Tsimane individuals living in one of three forest villages (**Supplementary Table 1**). The set of  
301 samples from the river villages was collected in September 2012 through March 2013, while that  
302 from forest villages was collected in July 2009.

303 A principal coordinates analysis of these microbiota data showed clustering of stool  
304 samples by ecotype of the village in which the subject lived (**Fig. 5b**, PERMANOVA,  $p < 0.05$ ).  
305 PC1, which explained 10.5% of the variation in the data, was significantly correlated with the  
306 diversity of the microbiotas (**Supplementary Fig. 6**,  $p < 0.001$ ,  $R^2 = 0.289$ ), although there was  
307 no significant difference in diversity between village types ( $p < 0.05$  for all comparisons). To  
308 evaluate whether these relationships might reflect an effect of market access on assembly  
309 processes, we applied the NCM to samples from infants and adults living in the three different  
310 village ecotypes with the regional species pool estimated from all of the samples from that age  
311 group and village ecotype, and found that the goodness of fit decreased in samples from  
312 villages with higher levels of market access (**Fig. 5c**). This suggested that market integration,  
313 perhaps through increased access to processed foods (*i.e.* breads, pasta, refined sugar) and/or  
314 medicine (*i.e.* antibiotics), may increase the role of ecological selection and diminish the role of  
315 stochastic dispersal during assembly of the gut microbiota.

316 To identify how even subtle ecological and economic differences among villagers might  
317 affect the gut microbiota, we used a phylogeny-based implementation of linear discriminant  
318 analysis. This approach uses both the leaves of the phylogenetic tree (*i.e.*, the ASVs), as well  
319 as the nodes to identify linear combinations of features that characterize two or more sample  
320 classes. The first model, built to discriminate between proximal and distal river villages, selected  
321 3 predictors corresponding to 10 ASVs. Nine of those ASVs, including 2 in the family  
322 Muribaculaceae (ASVs 5801 and 5805) and 7 in the family Bacteroidaceae (ASVs 5614, 5639,  
323 5697, 5510, 5620, 5651, 5716) were discriminatory for the distal river samples, while only 1  
324 ASV, in the family Prevotellaceae (ASV 5418), was discriminatory for the proximal river samples  
325 (**Fig. 5d**). Even though diversity was not significantly lower in proximal river villages

326 **(Supplementary Fig. 6)**, the small number of proximal village-discriminatory features is  
327 consistent with studies suggesting that life in a high resource setting often leads to loss of gut  
328 bacterial diversity<sup>39,40</sup>. Despite the small number of optimum features following 10-fold cross  
329 validation, the model accurately predicted village type for 87.3% of samples **(Supplementary**  
330 **Fig. 7)**.

331 The second model, built to discriminate between river and forest villages, identified 24  
332 predictors corresponding to 56 ASVs, and correctly identified the village type for 91.8% of the  
333 samples **(Supplementary Fig. 7)**. River villages were associated with ASVs in the bacterial  
334 families Prevotellaceae (18 ASVs), Lachnospiraceae (13 ASVs), Veillonellaceae (4 ASVs),  
335 Acidaminococcaceae (2 ASVs), and Ruminococcaceae (2 ASVs). Indicator taxa for Tsimane  
336 forest villages included ASVs in the bacterial families Ruminococcaceae (4 ASVs), Clostridiales  
337 Family XIII (2 ASVs), Lachnospiraceae (1 ASV), Muribaculaceae (1 ASV),  
338 Peptostreptococcaceae (1 ASV), and Christensenellaceae (7 ASVs), as well as 1 archaeal ASV  
339 in the family Methanobacteriaceae (1 ASV) **(Fig. 5d)**.

340 Christensenellaceae and Methanobacteriaceae were previously identified in a study of  
341 adult twins as members of a co-occurrence network of heritable gut microbiotas that were also  
342 associated with body leanness<sup>35,41</sup>. Since Tsimane have low but increasing rates of obesity<sup>23</sup>,  
343 we sought to determine if a similar network was present in the Tsimane adults. The optimal  
344 network topology constructed from adult stool microbial communities contained a subnetwork  
345 involving the most highly connected node, ASV 12 (*Methanobrevibacter*), as well as 5 ASVs in  
346 family Christensenellaceae **(Fig. 6a)**, indicating strong associations among these taxa. This  
347 subnetwork also included the second most highly connected node, *Prevotella copri* (ASV 5359).  
348 Although these two taxa frequently co-occurred, their abundances were inversely related **(Fig.**  
349 **6b**,  $p < 0.001$ , marginal  $R^2 = 0.205$ ). *Methanobrevibacter* and *Prevotella* have been shown to be  
350 positively correlated in the guts of humans<sup>42</sup> and western lowland gorillas<sup>43</sup>, especially in the  
351 setting of seasonal, carbohydrate-rich diets. These taxa also had distinct colonization dynamics

352 in the gut of infants from Bolivia (Tsimane), Bangladesh, and Finland. *Prevotella copri*, the  
353 same ASV that was abundant in Bolivian and Bangladeshi infants but essentially absent in  
354 Finnish infants, increased in abundance beginning at approximately 6 months of age, and  
355 remained at high levels throughout adulthood (**Fig. 6c**). *Methanobrevibacter*, on the other hand,  
356 was not detected in these gut microbiotas until later in adolescence (**Fig. 6c**). However, since  
357 *Methanobrevibacter* was more common in forest villages, and these villages did not include  
358 many samples from young children, this pattern may also have been a result of ecological,  
359 seasonal, or societal differences between villages.

360

## 361 DISCUSSION

362 Here we demonstrate that the Tsimane, an indigenous forager-horticulturalist population,  
363 display a distinct microbiota maturation trajectory among their infants. These colonization  
364 dynamics may be the result of intensive ICABs. Strain-resolved investigations of mother-infant  
365 transmission have found that most vertically transmitted microbes likely originate from the same  
366 body site in the mother, and that colonization of strains originating from other maternal body  
367 sites is relatively rare<sup>44</sup>. However, we observed evidence of maternal oral-to-infant gut  
368 transmission among Tsimane participants, which could be a reflection of traditional intensive  
369 ICABs like frequent pre-mastication, and consumption of chicha inoculated with maternal oral  
370 microbes. A study of Italian 4-month olds found that 9.5% of bacterial strains in their guts were  
371 also found on their mother's tongue<sup>44</sup>, whereas we observed an average of 23.7% of 3-5 month  
372 old Tsimane infant gut ASVs on their mother's tongue. While metagenomic sequencing allows  
373 investigators to track the transmission of specific strains, our 16S rRNA profiling approach,  
374 paired with the inference of exact sequence variants, enabled us to perform broad surveys of  
375 assembly patterns that can serve as an "upper bound" for estimating transmission rates. This  
376 approach also allowed us to apply statistical models to quantify underlying ecological processes  
377 that drive host-microbe biology. One important caveat is our assumption that microbes that were

378 shared between mothers and infants imply mother-to-infant transmission. Importantly, we  
379 cannot directly observe the direction of transmission, nor can we exclude the possibility that  
380 both mothers and children were colonized by microbes from other, unobserved sources.

381         The patterns of microbial prevalence and abundance fit the NCM less well in both adults  
382 and infants living in proximal river villages than did those from villages with less market  
383 integration. This suggests that the structure of the Tsimane microbiota may be changing in the  
384 face of rapid socioeconomic shifts in ways that decrease the contribution of neutral processes  
385 during childhood microbiota assembly, potentially altering interactions between highly abundant  
386 microbes like *Methanobrevibacter* and *Prevotella copri*. Perhaps it is not surprising that  
387 differences in subsistence strategies have been associated with differences in the gut  
388 microbiota of indigenous populations<sup>45</sup>, since even relatively modest differences in lifestyle can  
389 also lead to differences in the gut microbiota<sup>46</sup>. A recent study identified microbes that were  
390 differentially abundant in indigenous Bassa infants living in rural Nigeria versus infants living in  
391 nearby urban centers<sup>47</sup>, hinting that the observed microbiota differences in adults from  
392 traditional societies may be influenced by early life factors<sup>40</sup>. Here, we suggest that the  
393 differences observed between infants living in traditional societies and those living in or near  
394 industrialized cities might be the result of reduced neutral dispersal of microbes that  
395 accompanies the hygienic, medical, or societal changes associated with increased market  
396 integration. Alternatively, these changes may be the result of maternal microbiotas that have a  
397 decreased ability to stably colonize infants. Our findings lend support to the hypothesis that  
398 familial microbial transmission in western societies deviates from traditional modes of  
399 transmission<sup>48</sup>.

400         While there are substantial differences in bacterial taxa between adult populations from  
401 different regions and cultures, the prominent role of neutral assembly in infant guts is strikingly  
402 consistent. This is especially important in the transmission of commensal microbes in  
403 indigenous populations<sup>49</sup>, since these relatively isolated societies experience low levels of



404 microbial dispersal from outside their local communities, and exhibit a high degree of  
405 homogeneity in their microbiota composition<sup>33</sup>. Collectively, these observations of the microbiota  
406 in traditional populations have broad implications for understanding how ecological interactions  
407 operate during microbiota assembly, as well as how those patterns are altered due to broad  
408 societal changes that have arisen in concert with increased participation in market economies.

409

## 410 METHODS

### 411 *Ethics Approval*

412 All study protocols were approved by the University of California Santa Barbara  
413 Institutional Review Board on Human Subjects. Permission to conduct research was granted to  
414 the Tsimane Life History Project (THLHP) and their research affiliates. The THLHP maintains  
415 formal agreements with the local municipal government of San Borja and the Tsimane  
416 governing body. Consent was obtained from village leaders and individual participants upon  
417 initiating research activities in each village.

418

### 419 *Sample collection and processing*

420 The two sets of samples (2012-2013 and 2009) were collected as part of a long-term  
421 study of Tsimane health and life history, which also included detailed surveys of the subject's  
422 health, diet, and lifestyle. The first set of samples presented in this manuscript was collected  
423 from September 2012 through March 2013, and focused on 52 mother-child dyads and used a  
424 mixed longitudinal design. These individuals resided in six villages along the Maniqui River.  
425 These river villages were grouped into 'proximal' or 'distal' villages, based on their proximity to  
426 the same, nearest market town. Samples were collected together with data on breastfeeding  
427 status, 24-hour dietary recall, anthropometrics, and symptoms of infectious disease, as part of a  
428 study of changes in infant feeding and related maternal and infant health outcomes<sup>9</sup>. The  
429 second analysis presented in this manuscript included samples that were collected in July 2009;

430 a cross-sectional design specified collection of single stool samples from each of 73 Tsimane  
431 individuals ranging in age from 1 to 58 years old. These individuals resided in one of three forest  
432 villages between 31 and 68 kilometers from the nearest regional market.

433 Adult and infant fecal samples were collected in plastic containers by the adult subjects,  
434 which were then given to investigators typically within 1-2 hours. A portion of each sample was  
435 transferred to a cryotube and immediately frozen in liquid nitrogen. Oral samples were collected  
436 with a buccal cell collection swab (Catch-All™ Sample Collection Swab; Epicentre<sup>®</sup>), transferred  
437 to cryotubes and stored in liquid nitrogen. All samples were shipped on dry ice to a laboratory in  
438 the United States, where they remained at -80°C until they were processed. DNA was extracted  
439 from the samples using the MOBIO PowerSoil-htp Kit (MOBIO, Carlsbad, CA) following the  
440 manufacturer's instructions, including a 2 x 10 minute bead-beating step using the Retsch 96  
441 Well Plate Shaker at speed 20. The V4 hypervariable region of the 16S rRNA gene was then  
442 PCR-amplified in triplicate using bacterial specific primers (515F and 806R) that include error-  
443 correcting barcodes and Illumina adapters<sup>50</sup>. Amplicons were then pooled in equimolar ratios  
444 before being sequenced on two runs of an Illumina MiSeq 2x250 PE, generating a total of 35.5  
445 million raw reads.

446

#### 447 *16S rRNA gene sequencing and data processing*

448 Raw reads were denoised into Amplicon Sequence Variants (ASVs) using the DADA2  
449 pipeline (dada2, Version 1.9). Following generation of an ASV table, sequences were chimera-  
450 checked, and those remaining that were not 230-235 bps in length were removed. In addition to  
451 these data, publicly available 16S rRNA datasets from Bangladesh<sup>26</sup>, Finland<sup>27</sup>, and England<sup>35</sup>  
452 were downloaded, run through the DADA2 pipeline, and combined at the level of ASVs with the  
453 Tsimane dataset.

454 Taxonomic assignments were made using the RDP classifier and the SILVA nr database  
455 v132. ASVs that were not identified as Domain *Bacteria* or Domain *Archaea* were excluded from

456 further analyses. A phylogenetic tree of the total set of ASVs was inferred using the fragment  
457 insertion function (SEPP and `ppplacer`) in QIIME2 and the full SILVA v132 tree. An aggregated  
458 mapping file from all 4 of the datasets, the ASV table, the taxonomy table, and the phylogenetic  
459 tree were imported into R and combined into a single phyloseq object (`phyloseq`, version  
460 1.24.2).

461

#### 462 *Data analysis*

463 Both alpha-diversity (Shannon Diversity Index) and beta-diversity (Jaccard Index, Bray-  
464 Curtis Distance) analyses were performed in R. Statistical analyses including Wilcoxon tests  
465 and PERMANOVA tests were also performed in R. PCoA and canonical correspondence  
466 analysis (CCA) ordinations, boxplots, and scatter plots, were generated using the `ggplot2`  
467 package in R (version 3.2.0). Heatmaps were generated using the `pheatmap` R package  
468 (version 1.0.12). Amplicon sequence variant (ASV) abundances were centered and log ratio-  
469 transformed before performing a PCoA on the Jaccard pairwise distances. The partial CCA was  
470 performed on centered and log transformed ASV abundances constrained against a matrix of  
471 diet survey data, including the 7 MDD food groups, as well as information on meal frequency,  
472 frequency of consuming pre-masticated foods and liquids, frequency of consuming chicha, as  
473 well as chicha type. The effects of infant age and village were controlled using a conditioning  
474 matrix. Significance was assessed using an ANOVA-like permutation test with 999  
475 permutations. The principal curve was fit to the PCoA in **Fig. 4a** using the `princurve` R  
476 package (version 2.1.3).

477 For the treeDA analysis in **Fig. 5**, ASVs were removed if they were not observed at least  
478 10 times in at least 20% of Tsimane adult stool samples. ASVs were inverse hyperbolic sine-  
479 transformed before running the tree-based LDA algorithm in the `treeDA` R package (version

480 0.0.3). The LDA score of each adult stool sample was calculated from a phylogeny-based form  
481 of linear discriminant analysis optimized with 10-fold cross validation.

482 Network analysis was performed using the SPIEC-EASI function in the `SpiecEasi` R  
483 package (version 1.0.6) to infer an underlying graphical network model using both sparse  
484 neighborhood and inverse covariance selection<sup>51</sup>. ASVs were removed that were not observed  
485 at least 10 times in at least 20% of Tsimane adult stool samples. The network was constructed  
486 with the SPIEC-EASI network inference algorithm using the Meinshausen-Buhlmann  
487 Neighborhood Selection method. The size of the nodes were scaled to represent their degree of  
488 connectedness.

489

#### 490 *Modeling neutral community assembly*

491 As applied by Sloan *et al.* (2006), neutral assembly theory assumes that all microbes in  
492 a regional species pool have an equal ability to disperse to a local area, and once established,  
493 all have equal fitness, growth, and death rates<sup>34</sup>. These assumptions can be tested using a  
494 nonlinear least squares model available in the `minpack.lm` R package (version 1.2-1) to  
495 predict the prevalence of a microbe in a local community based on its average relative  
496 abundance in the regional species pool. Microbial distributions that are consistent with the  
497 model's predictions are well explained by neutral dispersal, while taxa that deviate from the  
498 model likely experience either positive or negative selection. Our approach was a modified  
499 version of one used in Burns *et al.*<sup>7</sup>; modeling and plotting functions are available in the `tyRa` R  
500 package (version 0.1.0) available at <https://danielsprockett.github.io/tyRa/>.

501

#### 502 *Data and Workflow Availability*

503 Raw sequencing data will be made available at NCBI Sequence Read Archive (SRA  
504 Project ID pending). A detailed description of these analyses, along with all analysis code and

505 raw data, are available at the Stanford Digital Repository (<https://purl.stanford.edu/tv993xn7633>)  
506 and as Supplementary Material.

507

## 508 ACKNOWLEDGEMENTS

509 We would like to thank the Tsimane host villages and families that participated in this  
510 study, as well as the THLHP staff and researchers who provided invaluable assistance during  
511 field data collection. We would also like to thank David Sela at the University of Massachusetts  
512 Amherst for help with initial study design, and Alvaro Hernandez at the University of Illinois Roy  
513 J. Carver Biotechnology Center for outstanding DNA sequencing services. This research was  
514 supported by the National Science Foundation NSF BCS 0422690 (M.G.), DDIG 1232370  
515 (M.M.), GRF DGE-114747 (D.S.), National Institute of Health grants NIH/NIGMS T32GM007276  
516 (D.S.), NIH/NIA R01AG024119 (M.G.), NIH/NICHD K99HD074743 (E.K.C.), the Thomas C. and  
517 Joan M. Merigan Endowment at Stanford University (D.A.R.), and the Chan Zuckerberg Biohub  
518 Microbiome Initiative (D.A.R.).

519

520 REFERENCES

- 521 1. Yatsunenko, T. *et al.* Human gut microbiome viewed across age and geography.  
522 *Nature* **486**, 222–227 (2012).
- 523 2. Palmer, C., Bik, E. M., DiGiulio, D. B., Relman, D. A. & Brown, P. O. Development  
524 of the human infant intestinal microbiota. *PLoS Biol.* **5**, e177 (2007).
- 525 3. Sharon, I. *et al.* Time series community genomics analysis reveals rapid shifts in  
526 bacterial species, strains, and phage during infant gut colonization. *Genome Res.*  
527 **23**, 111–120 (2013).
- 528 4. Yassour, M., Xavier, R. J. & Huttenhower, C. Strain-Level Analysis of Mother-to-  
529 Child Bacterial Transmission during the First Few Months of Life. *Cell Host Microbe*  
530 **24**, 146–154.e4 (2018).
- 531 5. Woodcock, S. *et al.* Neutral assembly of bacterial communities. *FEMS Microbiology*  
532 *Ecology* **62**, 171–180 (2007).
- 533 6. Venkataraman, A. *et al.* Application of a neutral community model to assess  
534 structuring of the human lung microbiome. *MBio* **6**, e02284-14 (2015).
- 535 7. Burns, A. R. *et al.* Contribution of neutral processes to the assembly of gut  
536 microbial communities in the zebrafish over host development. *ISME J.* **10**(3), 665-  
537 664 (2015).
- 538 8. Gurven, M. *et al.* The Tsimane Health and Life History Project: Integrating  
539 anthropology and biomedicine. *Evolutionary Anthropology: Issues, News, and*  
540 *Reviews* **26**, 54–73 (2017).
- 541 9. Martin, M. A., Garcia, G., Kaplan, H. S. & Gurven, M. D. Conflict or congruence?  
542 Maternal and infant-centric factors associated with shorter exclusive breastfeeding  
543 durations among the Tsimane. *Soc. Sci. Med.* **170**, 9–17 (2016).
- 544 10. Veile, A., Martin, M., McAllister, L. & Gurven, M. Modernization is associated with

- 545 intensive breastfeeding patterns in the Bolivian Amazon. *Soc. Sci. Med.* **100**, 148–  
546 158 (2014).
- 547 11. Rosinger, A. & Tanner, S. Water from fruit or the river? Examining hydration  
548 strategies and gastrointestinal illness among Tsimane' adults in the Bolivian  
549 Amazon. *Public Health Nutrition* **18**, 1098–1108 (2015).
- 550 12. Freire, A. L., Zapata, S., Mosquera, J., Mejia, M. L. & Trueba, G. Bacteria  
551 associated to human saliva are major microbial components of Ecuadorian  
552 indigenous beers (chicha). **4**, e1962 (2016). doi:10.7287/peerj.preprints.1520v2
- 553 13. Elizaquível, P. *et al.* Pyrosequencing vs. culture-dependent approaches to analyze  
554 lactic acid bacteria associated to chicha, a traditional maize-based fermented  
555 beverage from Northwestern Argentina. *Int. J. Food. Microbiol.* **198**, 9–18 (2015).
- 556 14. Colehour, A. M. *et al.* Local domestication of lactic acid bacteria via cassava beer  
557 fermentation. *PeerJ* **2**, e479 (2014).
- 558 15. Resende, L. V. *et al.* Microbial community and physicochemical dynamics during  
559 the production of 'Chicha', a traditional beverage of Indigenous people of Brazil.  
560 *World J Microbiol Biotechnol* **34**, 46
- 561 16. Puerari & Schwan, R. F. Physicochemical and microbiological characterization of  
562 chicha, a rice-based fermented beverage produced by Umutina Brazilian  
563 Amerindians. *Food Microbiology* **46**, 210–217 (2015).
- 564 17. McAllister, L., Gurven, M., Kaplan, H. & Stieglitz, J. Why do women have more  
565 children than they want? Understanding differences in women's ideal and actual  
566 family size in a natural fertility population. *Am. J. Hum. Biol.* **24**, 786–799 (2012).
- 567 18. Gurven, M. Infant and fetal mortality among a high fertility and mortality population  
568 in the Bolivian Amazon. *Soc. Sci. Med.* (2012).
- 569 19. Blackwell, A. D. *et al.* Evidence for a peak shift in a humoral response to helminths:  
570 age profiles of IgE in the Shuar of Ecuador, the Tsimane of Bolivia, and the U.S.

- 571 NHANES. *PLoS Negl Trop Dis* **5**, e1218 (2011).
- 572 20. McDade, T. W. *et al.* Predictors of C-reactive protein in Tsimane' 2 to 15  
573 year-olds in lowland Bolivia. *Am. J. Phys. Anthropol.* **128**, 906–913 (2005).
- 574 21. Vasunilashorn, S. *et al.* Blood lipids, infection, and inflammatory markers in the  
575 Tsimane of Bolivia. *Am. J. Hum. Biol.* **22**, 731–740 (2010).
- 576 22. Vasunilashorn, S. *et al.* Inflammatory Gene Variants in the Tsimane, an Indigenous  
577 Bolivian Population with a High Infectious Load. *Biodemography & Social Biol.* **57**,  
578 33–52 (2011).
- 579 23. Kaplan, H. *et al.* Coronary atherosclerosis in indigenous South American Tsimane:  
580 a cross-sectional cohort study. *Lancet* **389**, 1730–1739 (2017).
- 581 24. Kraft, T. S. *et al.* Nutrition transition in 2 lowland Bolivian subsistence populations.  
582 *Am. J. Clin. Nutr.* **108**, 1183–1195 (2018).
- 583 25. Bethancourt, H. J., Leonard, W. R., Tanner, S., Schultz, A. F. Longitudinal changes  
584 in measures of body fat and diet among adult Tsimane' forager-horticulturalists of  
585 Bolivia, 2002-2010. *Obesity* **27**(8), 1347-1359 (2019).
- 586 26. Subramanian, S. *et al.* Persistent gut microbiota immaturity in malnourished  
587 Bangladeshi children. *Nature* **510**, 417–421 (2014).
- 588 27. Vatanen, T., Kostic, A. D., d'Hennezel, E. & Siljander, H. Variation in Microbiome  
589 LPS Immunogenicity Contributes to Autoimmunity in Humans. *Cell* **165**(4), 842-853  
590 (2016).
- 591 28. DiGiulio, D. B. *et al.* Temporal and spatial variation of the human microbiota during  
592 pregnancy. *Proc. Natl. Acad. Sci. U.S.A.* **112**, 11060–11065 (2015).
- 593 29. Han, C. S. *et al.* Salivary microbiomes of indigenous Tsimane mothers and infants  
594 are distinct despite frequent premastication. *PeerJ* **4**, e2660 (2016).
- 595 30. Blackwell, A. D. *et al.* Growth references for Tsimane forager-horticulturalists of the  
596 Bolivian Amazon. *Am. J. Phys. Anthropol.* **162**, 441–461 (2017).



- 597 31. World Health Organization. Indicators for Assessing Infant and Young Child  
598 Feeding Practices. 1–26 (WHO Press, 2008).
- 599 32. Guerrant, R. L. *et al.* Biomarkers of environmental enteropathy, inflammation,  
600 stunting, and impaired growth in children in northeast Brazil. *PLoS ONE* **11**,  
601 e0158772 (2016).
- 602 33. Clemente, J. C., Pehrsson, E. C. & Blaser, M. J. The microbiome of uncontacted  
603 Amerindians. *Science Advances* **1**(3) e1500183 (2015).
- 604 34. Sloan, W. T. *et al.* Quantifying the roles of immigration and chance in shaping  
605 prokaryote community structure. *Environmental Microbiology* **8**, 732–740 (2006).
- 606 35. Goodrich, J. K. *et al.* Genetic Determinants of the Gut Microbiome in UK Twins. *Cell*  
607 *Host Microbe* **19**, 731–743 (2016).
- 608 36. Gorvitovskaia, A., Holmes, S. P. & Huse, S. M. Interpreting Prevotella and  
609 Bacteroides as biomarkers of diet and lifestyle. *Microbiome* **4**, 15 (2016).
- 610 37. Rosinger, A. Precursors to overnutrition: The effects of household market food  
611 expenditures on measures of body composition among Tsimane adults in lowland  
612 Bolivia. *Soc. Sci. Med.* **92**, 53–60 (2013).
- 613 38. Sobolewski, Weiss & Martin, M. Toxicanthropology: Phthalate exposure in relation  
614 to market access in a remote forager-horticulturalist population. *International*  
615 *Journal of Hygiene and Environmental Health* **220**, 799–809 (2017).
- 616 39. Smits, S. A. *et al.* Seasonal cycling in the gut microbiome of the Hadza hunter-  
617 gatherers of Tanzania. *Science* **357**, 802–806 (2017).
- 618 40. Mancabelli, L. *et al.* Meta-analysis of the human gut microbiome from urbanized  
619 and pre-agricultural populations. *Environmental Microbiology* **19**, 1379–1390  
620 (2017).
- 621 41. Goodrich, J. K. *et al.* Human genetics shape the gut microbiome. *Cell* **159**, 789–799  
622 (2014).

- 623 42. Hoffmann, C. *et al.* Archaea and Fungi of the Human Gut Microbiome: Correlations  
624 with Diet and Bacterial Residents. *PLoS ONE* **8**, e66019 (2013).
- 625 43. Hicks, A. L. *et al.* Gut microbiomes of wild great apes fluctuate seasonally in  
626 response to diet. *Nat. Commun.* **9**, 1786 (2018).
- 627 44. Ferretti, P. *et al.* Mother-to-Infant Microbial Transmission from Different Body Sites  
628 Shapes the Developing Infant Gut Microbiome. *Cell Host Microbe* **24**, 133–145.e5  
629 (2018).
- 630 45. Obregon-Tito, A. J. *et al.* Subsistence strategies in traditional societies distinguish  
631 gut microbiomes. *Nat. Commun.* **6**, 1–9 (2015).
- 632 46. Stagaman, K. *et al.* Market Integration Predicts Human Gut Microbiome Attributes  
633 across a Gradient of Economic Development. *mSystems* **3**, e00122–17 (2018).
- 634 47. Ayeni, F. A. *et al.* Infant and Adult Gut Microbiome and Metabolome in Rural Bassa  
635 and Urban Settlers from Nigeria. *Cell Rep.* **23**, 3056–3067 (2018).
- 636 48. Blaser, Martin The theory of disappearing microbiota and the epidemics of chronic  
637 diseases. *Nat. Rev. Immunol.* **17**, 461–463 (2017).
- 638 49. Brito, I. L. *et al.* Transmission of human-associated microbiota along family and  
639 social networks. *Nat. Microbiol.* **4**, 964–971 (2019).
- 640 50. Caporaso, J. G. *et al.* Ultra-high-throughput microbial community analysis on the  
641 Illumina HiSeq and MiSeq platforms. *ISME J.* **6**, 1621–1624 (2012).
- 642 51. Kurtz, Z. D. *et al.* Sparse and compositionally robust inference of microbial  
643 ecological networks. *PLoS Comput. Biol.* **11**, e1004226 (2015).

644

645

646 FIGURE LEGENDS

647 Figure 1. **Infant microbiota dynamics and dietary factors associated with maturation.** (a)  
648 Timeline denoting fecal sample and tongue swab collections for each mother-child dyad relative  
649 to the infant's birth date. For maternal samples, time refers to the immediate postpartum period.  
650 Infant stool samples are circles, adult stool samples are squares, infant and adult tongue swabs  
651 are triangles that point up and down, respectively. Shapes are colored by sample type (red =  
652 stool, blue = tongue swabs), and the color darkens as the subject's age increases. Shapes and  
653 colors are consistent across Figs. 1a–e. (b) Shannon Diversity Index regressed against the time  
654 since the infant's birth for stool samples. Lines indicate the linear mixed-effects regression of  
655 diversity on time since delivery, while treating subject as a random effect. The shading indicates  
656 the 95% confidence interval. The conditional  $R^2$  describes the proportion of variation explained  
657 by both the fixed and random factors. (c) Shannon Diversity Index regressed against the time  
658 since the infant's birth for tongue swab samples. Figure details are the same as in Fig. 1b. (d)  
659 Principal coordinate analysis (PCoA) of microbiota taxa composition in stool samples and  
660 tongue swabs from Tsimane dyads. (e) A partial canonical correspondence analysis (CCA) of  
661 ASV abundances, constrained against a matrix of diet survey data. The effects of infant age and  
662 village were controlled using a conditioning matrix. Significance was assessed using an  
663 ANOVA-like permutation test with 999 permutations, and only significant ( $p < 0.05$ ) factors are  
664 displayed.

665  
666 Figure 2. **Shared microbes are highly abundant within mother-infant dyads.** (a) Average  
667 relative abundance of ASVs that are shared or not shared within the stool samples of an infant-  
668 mother dyad plotted against the time since infant birth. Lines represent the best fit of a  
669 generalized additive model to either shared or not shared ASVs in the mother's (left) or infant's  
670 (right) stool samples. (b) Relationship between ASV prevalence in infant gut samples and the

671 rate at which the ASV is shared within infant-mother dyads. The points are colored according to  
672 their average relative abundance in maternal gut samples. (c) Average relative abundance of  
673 ASVs that are shared or not shared within the tongue swabs of an infant-mother dyad plotted  
674 against the time since infant birth. Figure details are the same as in Fig. 2a. (d) Relationship  
675 between ASV prevalence in infant tongue swabs and the rate at which the ASV is shared within  
676 infant-mother dyads. Figure details are the same as in Fig. 2b.

677

678 **Figure 3. Infant microbiotas assemble according to neutral rules.** (a) Neutral community  
679 model fit to each ASV observed in the stool of Tsimane infants, using either infant stool pool  
680 (left) or adult stool pool (right), as estimates of the regional species pool. Points are colored  
681 according to whether the taxon prevalence in infant samples is above (green), at (yellow), or  
682 below (red) the predicted prevalence according to the NCM. (b) Heatmap of the log normalized  
683 abundances of the ASVs from infant (left) and mother (right) stool samples that were observed  
684 in at least 25% of infant stool samples ( $n = 32$ ). Rows were clustered on the y-axis using Ward's  
685 minimum variance method. Row label colors correspond to the point colors in Fig. 3a. Columns  
686 were sorted by age for infants, and time since birth for mothers. (c) Neutral community model fit  
687 to each ASV observed from the tongue swabs of Tsimane infants, using either the infant tongue  
688 swab pool (left) or adult tongue swab pool (right), as estimates of the regional species pool.  
689 Figure details are the same as in Fig. 3a. (d) Heatmap of the log normalized abundances of  
690 ASVs from infant (left) and mother (right) stool samples that were observed in at least 25% of  
691 infant samples ( $n = 27$ ). Figure details are the same as in Fig. 3b.

692

693 **Figure 4. Patterns of selection and neutral assembly are consistent across ontogeny and**  
694 **geography.** (a) Principal coordinate analysis (PCoA) of stool samples from Bolivian (Tsimane)  
695 dyads, as well as previously published 16S rRNA datasets of Bangladeshi and Finnish infants,

696 as well as English adults. Points are shaped and colored according to country, and the color  
697 darkens with increased age of the subject (Finland - blue squares, England – green squares,  
698 Bolivia (Tsimane) – red circles, Bangladesh – yellow triangles). A principal curve was fit for each  
699 of the three populations (Bolivian (Tsimane), Bangladeshi, and European (Finnish/English)). (b)  
700 A summary of the proportion of ASVs present in each country and age group that fit the model  
701 (yellow), or was above (green) or below (red) the model's prediction. See Supplementary Fig. 5  
702 for details. (c) Principal coordinate analysis using the Jaccard distance for each of the 3 data  
703 partitions of four age groups from 3 countries (36 measurements in total). The color indicates  
704 the predicted fit, the shape indicates the country whence the samples were collected, and the  
705 size of each shape is scaled to indicate the age group of the subject. (d) The estimated  
706 migration rate ( $m$ ) given by the neutral community model for each country and age group.  
707 Vertical lines represent 95% confidence intervals. Colors and shapes are the same as in Fig.  
708 4a. (e) A heatmap of the log normalized abundances of ASVs that were estimated to be above  
709 their predicted prevalence given their average relative abundance in all 12 green partitions in  
710 Fig. 4c. Rows were clustered on the y-axis using Ward's minimum variance method. Columns  
711 were sorted by infant age (0-12 months).

712

713 **Figure 5. Market access is associated with Tsimane gut microbiota structure.** (a) A map  
714 showing the location of the 9 Tsimane villages whence stool samples were collected. The size  
715 of each circle was scaled to the number of samples collected from that village, with the  
716 exception of the market town, where no samples were collected. The map insert denotes the  
717 region of Bolivia being displayed. (b) Principal coordinate analysis (PCoA) on the Bray-Curtis  
718 distance of 16S rRNA profiles from adult stool samples. Village types ('proximal' river, 'distal'  
719 river, and 'forest') have significantly different distributions (PERMANOVA with 1000  
720 permutations,  $p = 0.001$ ). Samples are colored by village and their shapes denote the village

721 type (proximal river villages – circles, distal river villages – triangles, forest villages – squares).  
722 (c) Neutral community model fit to each ASV observed in the stool of Tsimane adults (top row)  
723 or infants (bottom row) from each of three village types (proximal river – left, distal river – right,  
724 and forest – left). In each case, the composition of the regional species pool was estimated  
725 using the samples from the age group and village type. The gray line is the predicted distribution  
726 (shaded area is 95% CI), and points are colored according to whether their prevalence in infant  
727 samples was above (green), at (yellow), or below (red) their predicted prevalence according to  
728 the NCM. (d) Phylogenetic tree with ASVs found at least 10 times in at least 20% of Tsimane  
729 adult stool samples. Discriminatory ASVs were identified using the tree-based LDA algorithm in  
730 the `treeDA` R package (version 0.0.3). ASVs are denoted by shapes based on two sets of  
731 comparisons (circles for river vs. forest and squares for proximal river vs. distal river), and are  
732 colored based on their discriminatory strength. ASVs are colored by taxonomic family and  
733 significantly discriminatory ASVs are labeled with their ASV number.

734

735 **Figure 6. Network analysis reveals an inverse relationship between highly-connected**  
736 **taxa.** (a) A network diagram of ASVs observed at least 10 times in at least 20% of Tsimane  
737 adult stool samples. The size of the node was scaled to represent its degree of connectedness.  
738 The insert shows the complete network colored by network degree, while the main figure shows  
739 the highly-connected subgraph colored by each ASV's taxonomic family. Positive associations  
740 between ASV nodes are colored gray, while negative associations are colored red. (b) A scatter  
741 plot of the log transformed relative abundances of the two most highly connected ASVs in the  
742 network, *Methanobrevibacter* sp. (ASV 12) and *Prevotella copri* (ASV 5359). The red line  
743 indicates the linear mixed-effects regression while treating subject as a random effect, and  
744 shading indicates the 95% confidence interval. Samples are colored by village, and their shapes  
745 represent the village type (proximal river – circles, distal river – triangles, forest – squares). (c)

746 Scatter plot of the relative abundances of *Methanobrevibacter* sp. (ASV 12) and *Prevotella copri*  
747 (ASV 5359) and the subject's age in months at the time of collection. The x-axis was log  
748 transformed for clarity when plotting both infant and adult samples. Ages 1, 2, 3, 4, 5, 10, 20,  
749 30, 40, 50, and 60 years are denoted by horizontal dashed lines.

750

751 Supplementary Figure 1. **Gut and oral microbiotas diverge as infants age.** Average number  
752 of ASVs shared between body sites within a subject based on samples collected within 14 days  
753 of each other. Boxplot color darkens with increasing age. Adults and 16-18 month olds were the  
754 only sequential age groups whose microbiotas were significantly different from one another  
755 (Wilcoxon rank-sum test,  $p = 0.03$ ).

756

757 Supplementary Figure 2. **Diet and inflammation impact the infant gut microbiota.** (a) The  
758 World Health Organization's minimum diet diversity (MDD) score regressed against the  
759 Shannon Diversity Index from the infant stool samples. The MDD was validated to assess the  
760 diversity of complementary foods of 6-23 month old children in a diverse range of cultural  
761 contexts. It should only be interpreted as an estimate of micronutrient sufficiency in children  
762 aged 6-23 months, which are denoted by a diamond shape, and the color darkens as the  
763 subject's age increases. MDD of 4 is considered to be sufficiently diverse, as indicated by the  
764 vertical dashed line. Lines indicate the linear mixed-effects regression of diversity on MDD,  
765 while treating subject as a random effect. The shading indicates the 95% confidence interval.  
766 The conditional  $R^2$  describes the proportion of variation explained by both fixed and random  
767 factors. (B) Levels of fecal neopterin, an inflammatory marker normally produced by activated  
768 macrophages, regressed against the Shannon Diversity Index in infant stool samples. Lines  
769 indicate the linear mixed-effects regression of diversity on neopterin, while treating subject as a  
770 random effect. The shading indicates the 95% confidence interval. The conditional  $R^2$  describes

771 the proportion of variation explained by both fixed and random factors. A neopterin level above  
772 10, as indicated by the vertical dashed line, indicates clinically relevant inflammation.

773

774 Supplementary Figure 3. **Sources of infant-colonizing microbes.** (a) Scatter plot of the  
775 average number of ASVs found in each infant stool sample that were also found in that infant's  
776 mother but not in other adults from their village (blue), in both their mother and other mothers  
777 from their village (green), in other mothers from the infant's village but not their mother (yellow),  
778 or in neither their mother or other adults (orange). Non-parent adults from each village were  
779 down-sampled to control for differences in the number of samples collected from each village.  
780 Left panel – infant stool samples, right panel – infant tongue swabs. (b) Average number of  
781 ASVs shared between multiple samples from the same mother, between mothers living in the  
782 same village, or mothers living in different villages. Wilcoxon Rank Sum Test. \*\*\*\*:  $p \leq 0.0001$ ,  
783 \*\*:  $p \leq 0.01$ , \*:  $p \leq 0.05$ , ns:  $p > 0.05$ . Left panel – adult stool samples, right panel – adult  
784 tongue swabs. (c) Scatter plot of the average number of ASVs in each infant stool sample that  
785 was also found in their mother's stool but not in her tongue swab (purple), in both their mother's  
786 stool and tongue swab (green), in their mother's tongue swab but not their mother's stool  
787 (yellow), or not found in any of their mother's samples (orange).

788

789 Supplementary Figure 4. **Infants from different countries reach a population-specific adult-**  
790 **like state at different rates.** (a) In Fig. 4a, a PCoA was performed on 16S rRNA datasets from  
791 three populations (Bolivian (Tsimane), Bangladeshi, and European (Finnish/British)), and a  
792 principal curve was fit to each set of points using the `princurve` function in the `princurve` R  
793 package (version 2.1.3). The distance along each curve was scaled so that the mean location of  
794 the adult samples was equal to one (as indicated by the horizontal gray line), making an infant's



795 location along the curve analogous to their position along the average maturational trajectory  
796 towards the average adult in their society. Here, we show the linear regression of the age of the  
797 infant from whom each sample was collected against its position along its principal curve. Lines  
798 indicate the linear mixed-effects regression of principal curve position on the infant's age in  
799 months, while treating subject as a random effect. The shading indicates the 95% confidence  
800 interval. The vertical dashed lines indicate the age at which the infant line from each country  
801 crosses the adult average position for that country.

802

803 Supplementary Figure 5. **Neutral processes explain microbial community assembly across**  
804 **age groups and geography.** Scatterplot of the prevalence of each ASV in the infant gut versus  
805 its mean relative abundance in the regional species pool for each age group and country. The  
806 gray line is their predicted distribution (shaded area is 95% confidence interval) based on the  
807 neutral community model. Points are colored by the ASV's fit to the model: above prediction—  
808 green, below prediction— red, at prediction – yellow.

809

810 Supplementary Figure 6. **Gut microbiota diversity among Tsimane villages.** (a) Shannon  
811 Diversity Index plotted against the PC1 value from Fig. 5b ( $R^2 = 0.289$ ,  $p < 0.001$ ). The red line  
812 indicates the linear mixed-effects regression while treating subject as a random effect, and  
813 shading indicates the 95% confidence interval. The conditional  $R^2$  describes the proportion of  
814 the variation explained by both fixed and random factors. (b) Boxplot comparing the average  
815 diversity of adult stool microbiota of samples collected from proximal river, distal river, and forest  
816 Tsimane villages ( $p > 0.05$  for all comparisons).

817

818 Supplementary Figure 7. **Bacterial taxa discriminate between village types.** (a) The LDA

819 score of each adult stool sample was calculated from a phylogeny-based form of linear  
820 discriminant analysis (`treeDA`, version 0.0.3). Higher scores indicate samples more likely to  
821 have been collected from a proximal river village, while lower scores indicate samples more  
822 likely to have been collected from a distal river village. The dashed gray line represents the  
823 optimal LDA score cut-off between groups, where it accurately classifies 87.3% of samples.  
824 Samples are colored by village, and their shapes represent the village type (proximal river –  
825 circles, distal river – triangles, forest – squares). (b) The LDA score of each adult stool sample  
826 was calculated from a phylogeny-based form of linear discriminant analysis (`treeDA`, version  
827 0.0.3). Higher scores indicate samples more likely from a forest village, while lower scores  
828 indicate samples more likely from a river village. The dashed gray line represents the optimal  
829 LDA score cut-off between groups, where it accurately classifies 91.8% of samples. The colors  
830 and shapes are the same as in panel a.

831

### 832 **Supplementary Table 1. Demographics of Tsimane villages and study subjects**

833 Villages are listed in order of increasing distance from the closest market town. Age classes are  
834 defined as Infant – under 2 years, Child – 2 to 13 years old, Adult – 14 years old and older. The  
835 73 fecal samples collected from forest communities were collected in July 2009, while the  
836 remaining fecal and oral samples from proximal and distal river communities were collected  
837 between September 2012 and March 2013. \*Population sizes for forest villages were collected  
838 during a 2009 census, while the remaining were collected in a 2012 census.

**Figure 1**

**a.**

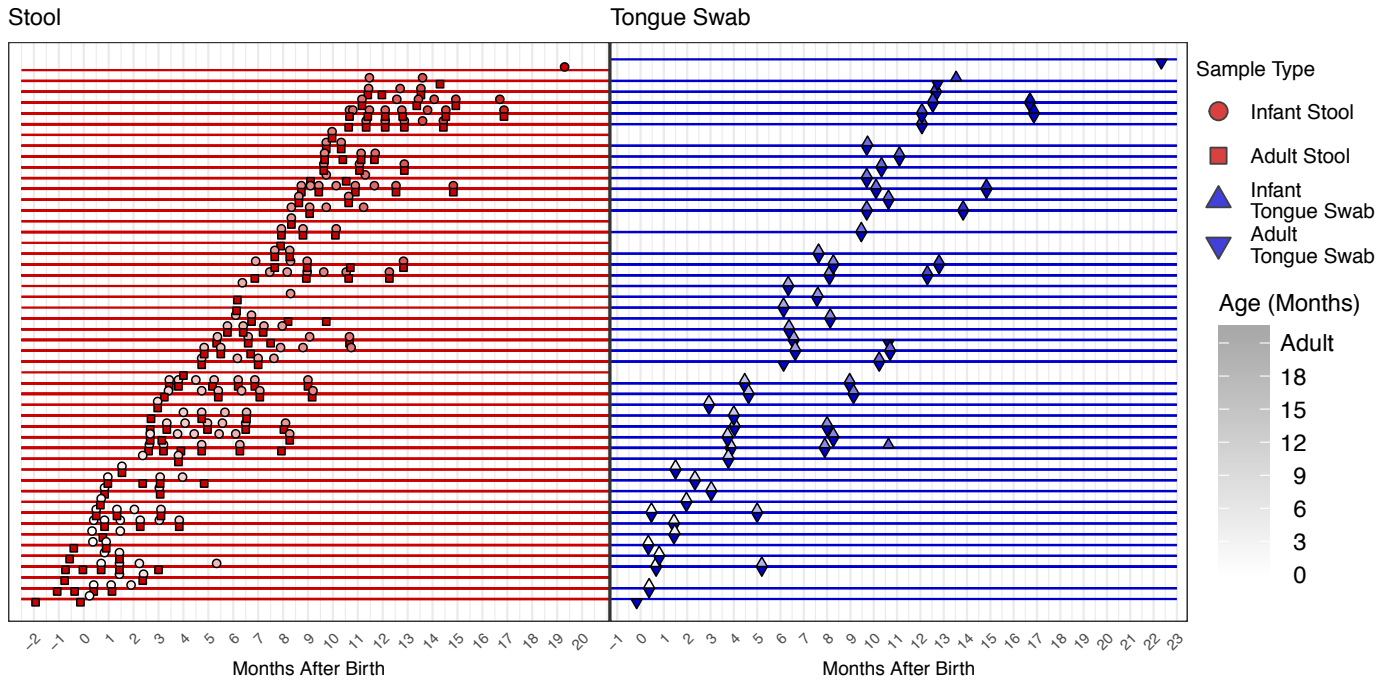

**b.**

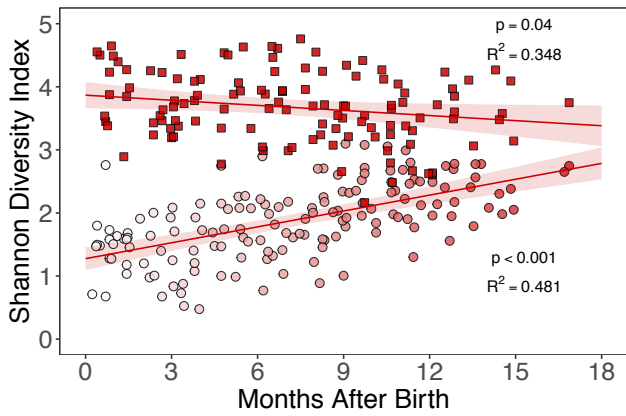

**c.**

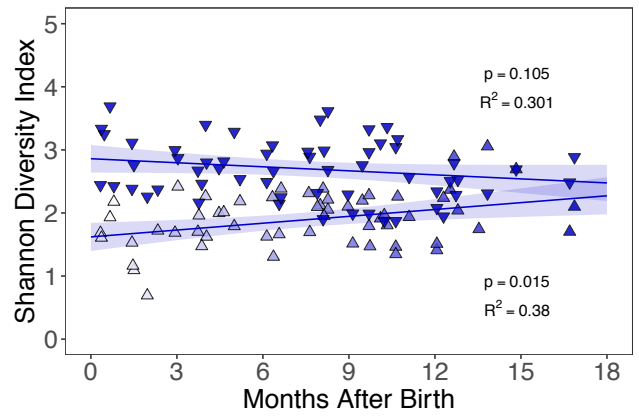

**d.**

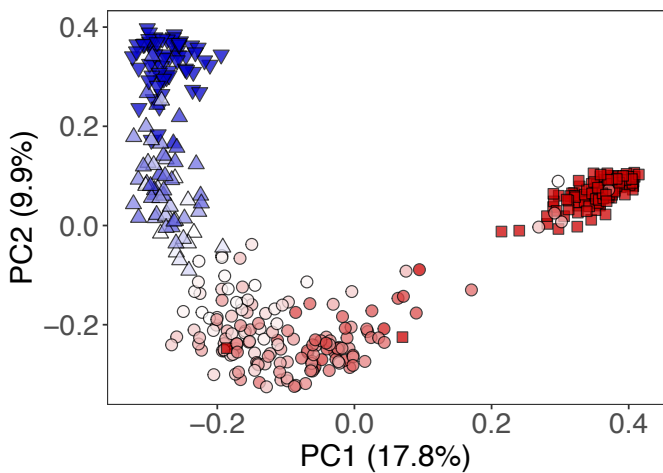

**e.**

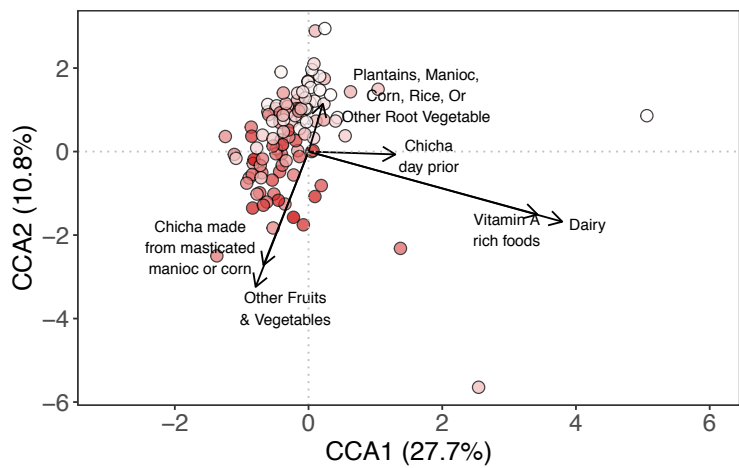

**Figure 1. Infant microbiota dynamics and dietary factors associated with maturation.**

(a) Timeline denoting fecal sample and tongue swab collections for each mother-child dyad relative to the infant's birth date. For maternal samples, time refers to the immediate postpartum period. Infant stool samples are circles, adult stool samples are squares, infant and adult tongue swabs are triangles that point up and down, respectively. Shapes are colored by sample type (red = stool, blue = tongue swabs), and the color darkens as the subject's age increases. Shapes and colors are consistent across Figs. 1a–e. (b) Shannon Diversity Index regressed against the time since the infant's birth for stool samples. Lines indicate the linear mixed-effects regression of diversity on time since delivery, while treating subject as a random effect. The shading indicates the 95% confidence interval. The conditional  $R^2$  describes the proportion of variation explained by both the fixed and random factors. (c) Shannon Diversity Index regressed against the time since the infant's birth for tongue swab samples. Figure details are the same as in Fig. 1b. (d) Principal coordinate analysis (PCoA) of microbiota taxa composition in stool samples and tongue swabs from Tsimane dyads. (e) A partial canonical correspondence analysis (CCA) of ASV abundances, constrained against a matrix of diet survey data. The effects of infant age and village were controlled using a conditioning matrix. Significance was assessed using an ANOVA-like permutation test with 999 permutations, and only significant ( $p < 0.05$ ) factors are displayed.

**Figure 2**

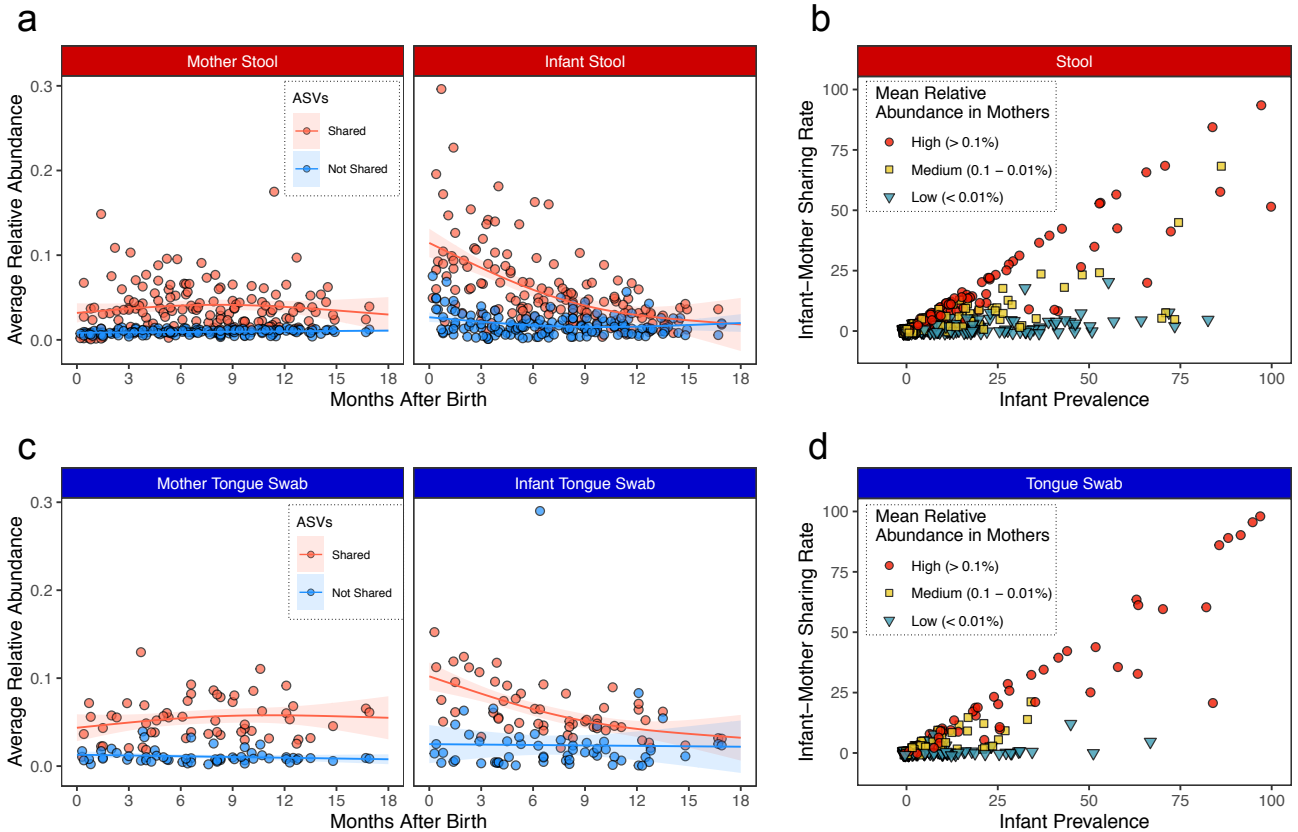

**Figure 2. Shared microbes are highly abundant within mother-infant dyads.** (a) Average relative abundance of ASVs that are shared or not shared within the stool samples of an infant-mother dyad plotted against the time since infant birth. Lines represent the best fit of a generalized additive model to either shared or not shared ASVs in the mother's (left) or infant's (right) stool samples. (b) Relationship between ASV prevalence in infant gut samples and the rate at which the ASV is shared within infant-mother dyads. The points are colored according to their average relative abundance in maternal gut samples. (c) Average relative abundance of ASVs that are shared or not shared within the tongue swabs of an infant-mother dyad plotted against the time since infant birth. Figure details are the same as in Fig. 2a. (d) Relationship between ASV prevalence in infant tongue swabs and the rate at which the ASV is shared within infant-mother dyads. Figure details are the same as in Fig. 2b.

**Figure 3**

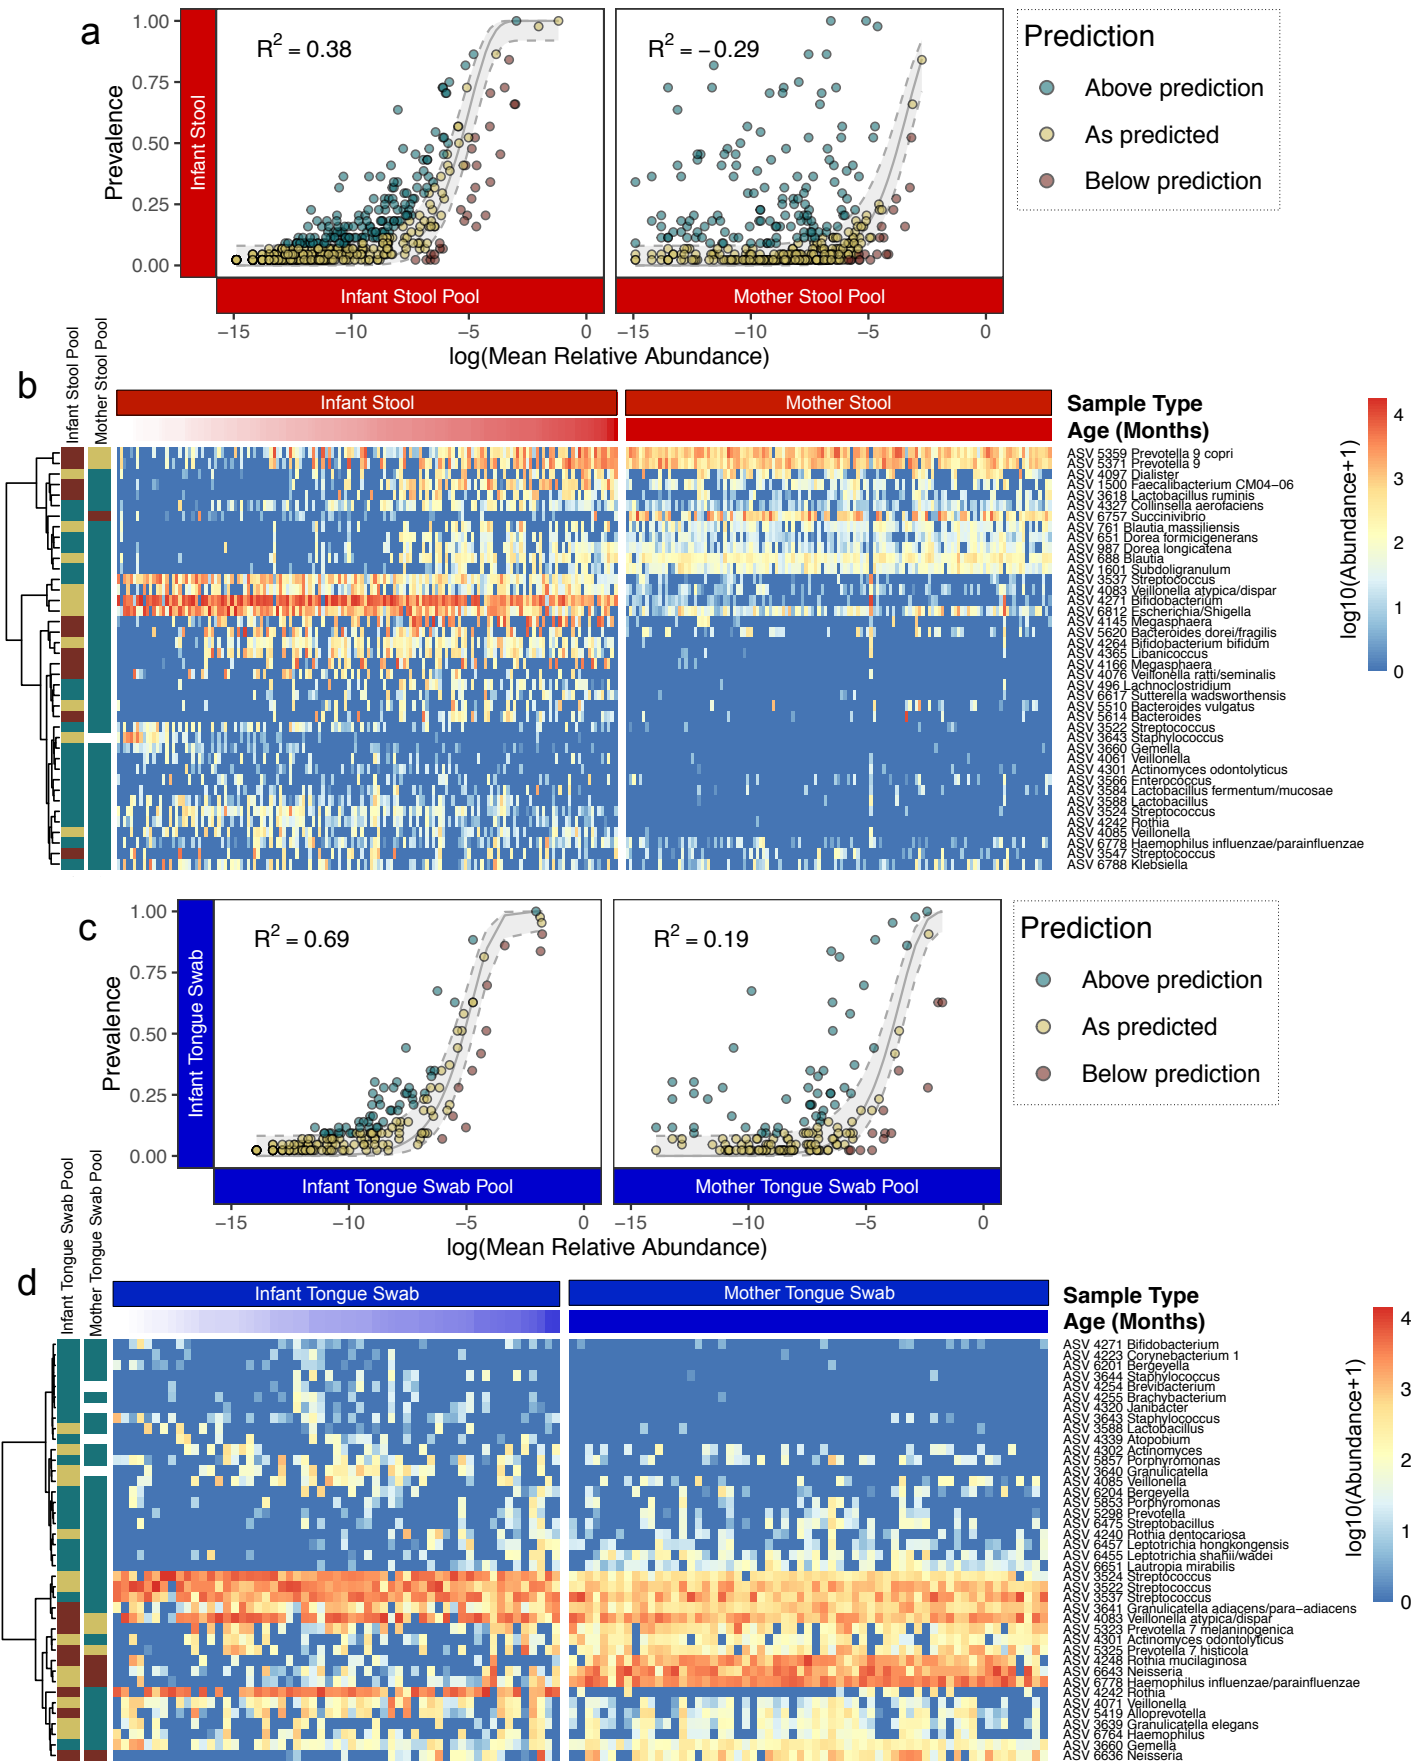

**Figure 3. Infant microbiotas assemble according to neutral rules.** (a) Neutral community model fit to each ASV observed in the stool of Tsimane infants, using either infant stool pool (left) or adult stool pool (right), as estimates of the regional species pool. Points are colored according to whether the taxon prevalence in infant samples is above (green), at (yellow), or below (red) the predicted prevalence according to the NCM. (b) Heatmap of the log normalized abundances of the ASVs from infant (left) and mother (right) stool samples that were observed in at least 25% of infant stool samples ( $n = 32$ ). Rows were clustered on the y-axis using Ward's minimum variance method. Row label colors correspond to the point colors in Fig. 3a. Columns were sorted by age for infants, and time since birth for mothers. (c) Neutral community model fit to each ASV observed from the tongue swabs of Tsimane infants, using either the infant tongue swab pool (left) or adult tongue swab pool (right), as estimates of the regional species pool. Figure details are the same as in Fig. 3a. (d) Heatmap of the log normalized abundances of ASVs from infant (left) and mother (right) stool samples that were observed in at least 25% of infant samples ( $n = 27$ ). Figure details are the same as in Fig. 3b.





**Figure 4. Patterns of selection and neutral assembly are consistent across ontogeny and geography.** (a) Principal coordinate analysis (PCoA) of stool samples from Bolivian (Tsimane) dyads, as well as previously published 16S rRNA datasets of Bangladeshi and Finnish infants, as well as English adults. Points are shaped and colored according to country, and the color darkens with increased age of the subject (Finland - blue squares, England – green squares, Bolivia (Tsimane) – red circles, Bangladesh – yellow triangles). A principal curve was fit for each of the three populations (Bolivian (Tsimane), Bangladeshi, and European (Finnish/English)). (b) A summary of the proportion of ASVs present in each country and age group that fit the model (yellow), or was above (green) or below (red) the model's prediction. See Supplementary Fig. 5 for details. (c) Principal coordinate analysis using the Jaccard distance for each of the 3 data partitions of four age groups from 3 countries (36 measurements in total). The color indicates the predicted fit, the shape indicates the country whence the samples were collected, and the size of each shape is scaled to indicate the age group of the subject. (d) The estimated migration rate ( $m$ ) given by the neutral community model for each country and age group. Vertical lines represent 95% confidence intervals. Colors and shapes are the same as in Fig. 4a. (e) A heatmap of the log normalized abundances of ASVs that were estimated to be above their predicted prevalence given their average relative abundance in all 12 green partitions in Fig. 4c. Rows were clustered on the y-axis using Ward's minimum variance method. Columns were sorted by infant age (0-12 months).

**Figure 5**

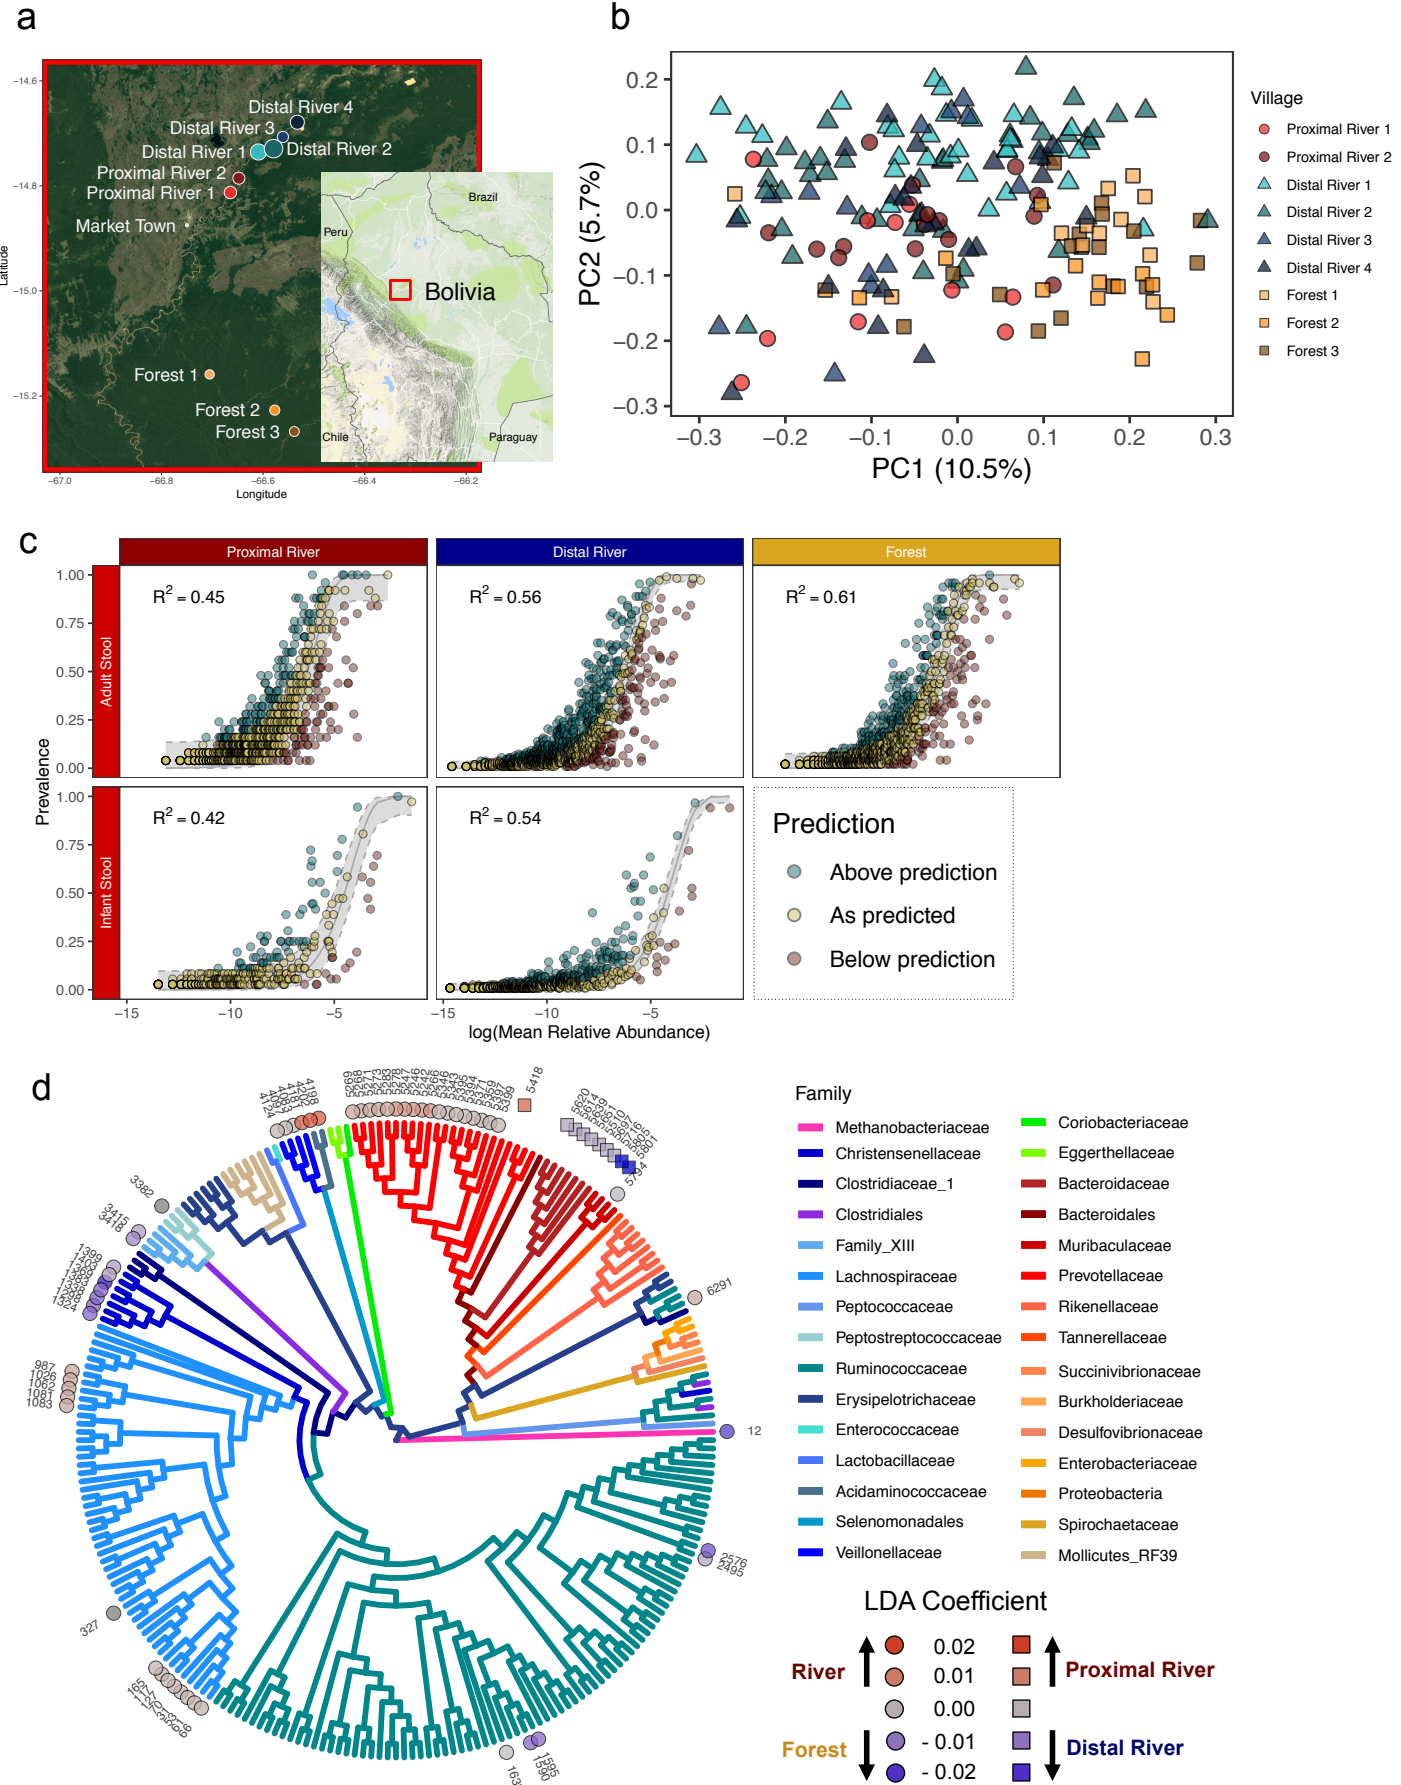

**Figure 5. Market access is associated with Tsimane gut microbiota structure.** (a) A map showing the location of the 9 Tsimane villages whence stool samples were collected. The size of each circle was scaled to the number of samples collected from that village, with the exception of the market town, where no samples were collected. The map insert denotes the region of Bolivia being displayed. (b) Principal coordinate analysis (PCoA) on the Bray-Curtis distance of 16S rRNA profiles from adult stool samples. Village types ('proximal' river, 'distal' river, and 'forest') have significantly different distributions (PERMANOVA with 1000 permutations,  $p = 0.001$ ). Samples are colored by village and their shapes denote the village type (proximal river villages – circles, distal river villages – triangles, forest villages – squares). (c) Neutral community model fit to each ASV observed in the stool of Tsimane adults (top row) or infants (bottom row) from each of three village types (proximal river – left, distal river – right, and forest – left). In each case, the composition of the regional species pool was estimated using the samples from the age group and village type. The gray line is the predicted distribution (shaded area is 95% CI), and points are colored according to whether their prevalence in infant samples was above (green), at (yellow), or below (red) their predicted prevalence according to the NCM. (d) Phylogenetic tree with ASVs found at least 10 times in at least 20% of Tsimane adult stool samples. Discriminatory ASVs were identified using the tree-based LDA algorithm in the treeDA R package (version 0.0.3). ASVs are denoted by shapes based on two sets of comparisons (circles for river vs. forest and squares for proximal river vs. distal river), and are colored based on their discriminatory strength. ASVs are colored by the taxonomic family and significantly discriminatory ASVs are labeled with their ASV number.

Figure 6

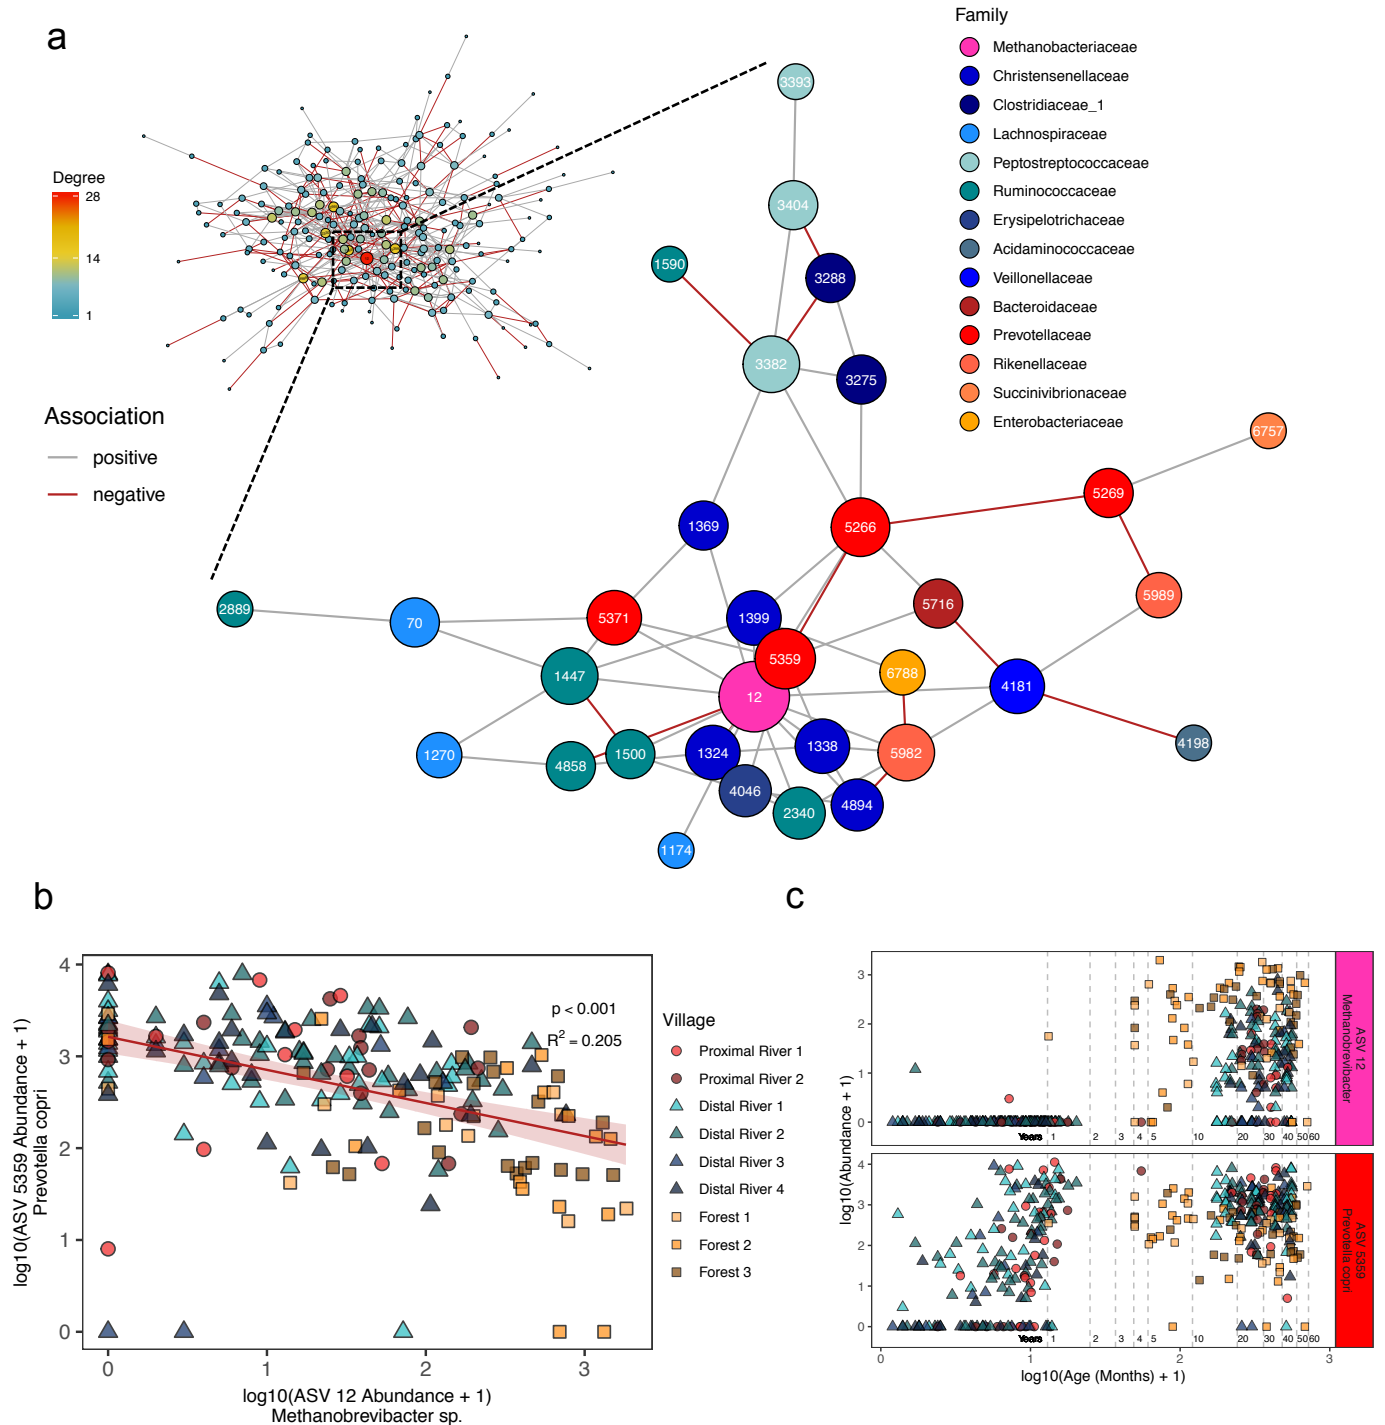

Figure 6. **Network analysis reveals an inverse relationship between highly-connected taxa.** (a) A network diagram of ASVs observed at least 10 times in at least 20% of Tsimane adult stool samples. The size of the node was scaled to represent its degree of connectedness. The insert shows the complete network colored by network degree, while the main figure shows the highly-connected subgraph colored by each ASV's taxonomic family. Positive associations between ASV nodes are colored gray, while negative associations are colored red. (b) A scatter plot of the log transformed relative abundances of the two most

highly connected ASVs in the network, *Methanobrevibacter* sp. (ASV 12) and *Prevotella copri* (ASV 5359). The red line indicates the linear mixed-effects regression while treating subject as a random effect, and shading indicates the 95% confidence interval. The conditional  $R^2$  describes the proportion of variation explained by both the fixed and random factors. Samples are colored by village, and their shapes represent the village type (proximal river – circles, distal river – triangles, forest – squares). (c) Scatter plot of the relative abundances of *Methanobrevibacter* sp. (ASV 12) and *Prevotella copri* (ASV 5359) and the subject's age in months at the time of collection. The x-axis was log transformed for clarity when plotting both infant and adult samples. Ages 1, 2, 3, 4, 5, 10, 20, 30, 40, 50, and 60 years are denoted by horizontal dashed lines.

## Supplementary Figure 1

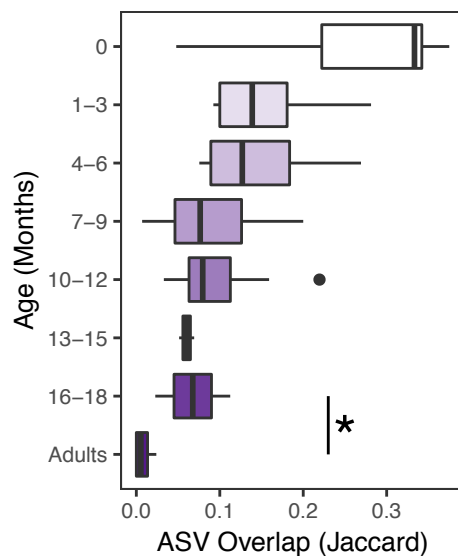

Supplementary Figure 1. **Gut and oral microbiotas diverge as infants age.** Average number of ASVs shared between body sites within a subject based on samples collected within 14 days of each other. Boxplot color darkens with increasing age. Adults and 16-18 month olds were the only sequential age groups whose microbiotas were significantly different from one another (Wilcoxon rank-sum test,  $p = 0.03$ ).

## Supplementary Figure 2

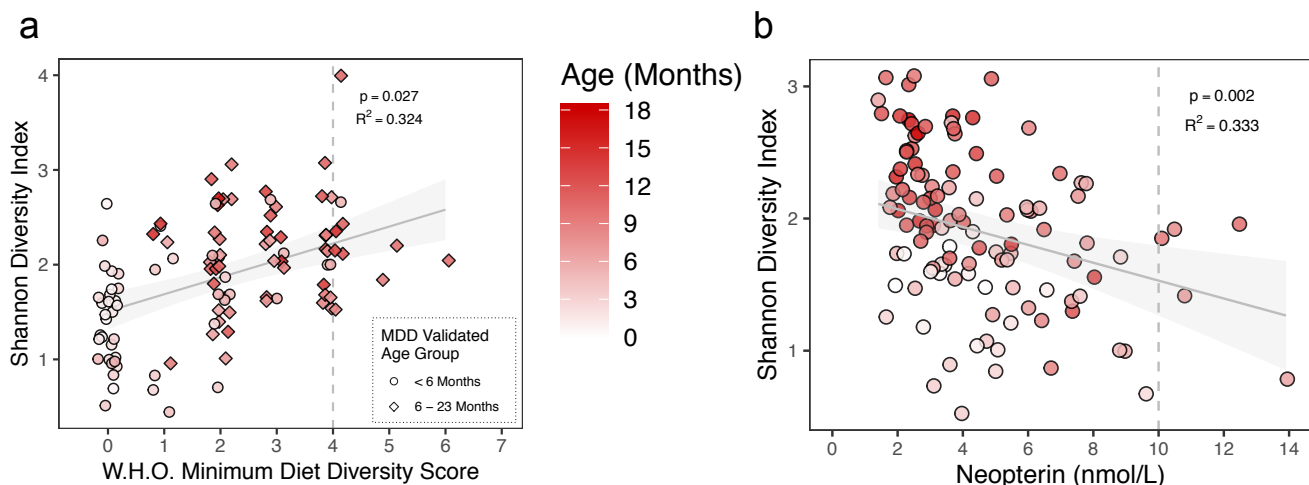

Supplementary Figure 2. **Diet and inflammation impact the infant gut microbiota.** (a) The World Health Organization's minimum diet diversity (MDD) score regressed against the Shannon Diversity Index from the infant stool samples. The MDD was validated to assess the diversity of complementary foods of 6-23 month old children in a diverse range of cultural contexts. It should only be interpreted as an estimate of micronutrient sufficiency in children aged 6-23 months, which are denoted by a diamond shape, and the color darkens as the subject's age increases. MDD of 4 is considered to be sufficiently diverse, as indicated by the vertical dashed line. Lines indicate the linear mixed-effects regression of diversity on MDD, while treating subject as a random effect. The shading indicates the 95% confidence interval. The conditional  $R^2$  describes the proportion of variation explained by both fixed and random factors. (B) Levels of fecal neopterin, an inflammatory marker normally produced by activated macrophages, regressed against the Shannon Diversity Index in infant stool samples. Lines indicate the linear mixed-effects regression of diversity on neopterin, while treating subject as a random effect. The shading indicates the 95% confidence interval. The conditional  $R^2$  describes the proportion of variation explained by both fixed and random factors. A neopterin level above 10, as indicated by the vertical dashed line, indicates clinically relevant inflammation.

# Supplementary Figure 3

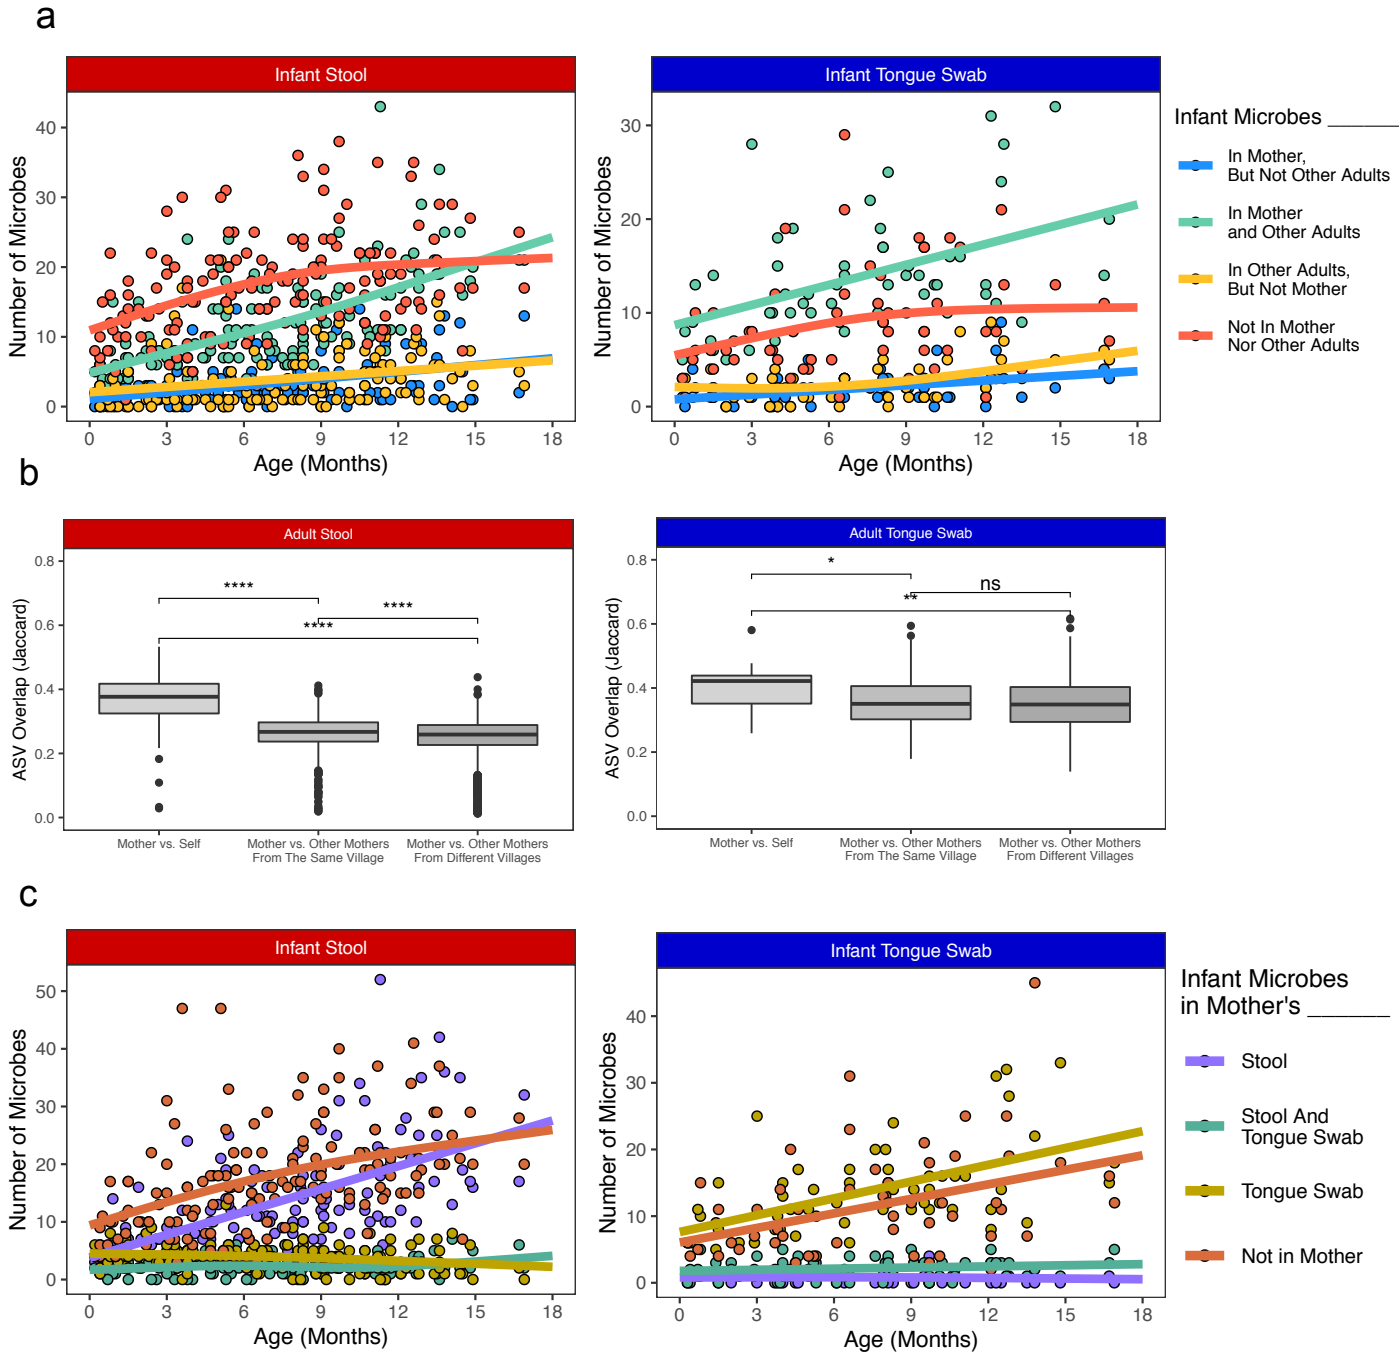

Supplementary Figure 3. **Sources of infant-colonizing microbes.** (a) Scatter plot of the average number of ASVs found in each infant stool sample that were also found in that infant's mother but not in other adults from their village (blue), in both their mother and other mothers from their village (green), in other mothers from the infant's village but not their mother (yellow), or in neither their mother or other adults (orange). Non-parent adults from each village were down-sampled to control for differences in the number of samples collected from each village. Left panel – infant stool samples, right panel – infant tongue swabs. (b) Average number of ASVs shared between multiple samples from the same mother, between



mothers living in the same village, or mothers living in different villages. Wilcoxon Rank Sum Test. \*\*\*\*:  $p \leq 0.0001$ , \*\*:  $p \leq 0.01$ , \*:  $p \leq 0.05$ , ns:  $p > 0.05$ . Left panel – adult stool samples, right panel – adult tongue swabs. (c) Scatter plot of the average number of ASVs in each infant stool sample that was also found in their mother's stool but not in her tongue swab (purple), in both their mother's stool and tongue swab (green), in their mother's tongue swab but not their mother's stool (yellow), or not found in any of their mother's samples (orange).

## Supplementary Figure 4

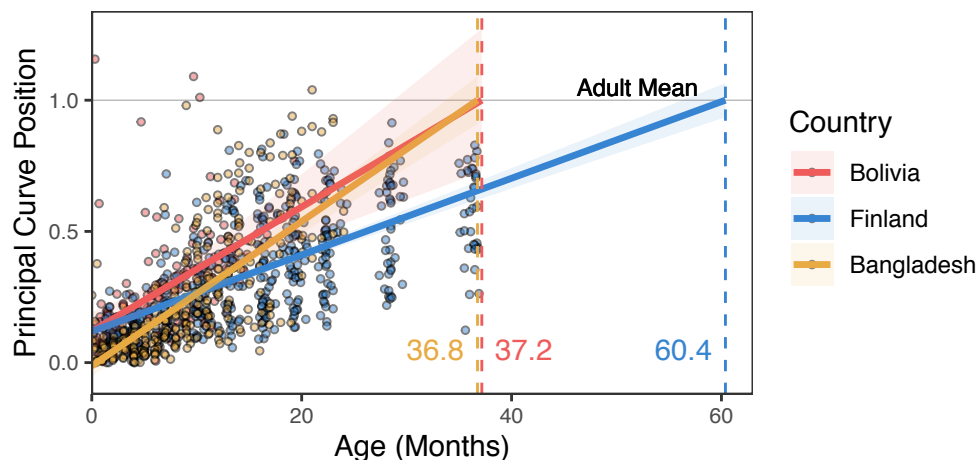

Supplementary Figure 4. **Infants from different countries reach a population-specific adult-like state at different rates.** (a) In Fig. 4a, a PCoA was performed on 16S rRNA datasets from three populations (Bolivian (Tsimane), Bangladeshi, and European (Finnish/British)), and a principal curve was fit to each set of points using the `princurve` function in the `princurve` R package (version 2.1.3). The distance along each curve was scaled so that the mean location of the adult samples was equal to one (as indicated by the horizontal gray line), making an infant's location along the curve analogous to their position along the average maturational trajectory towards the average adult in their society. Here, we show the linear regression of the age of the infant from whom each sample was collected against its position along its principal curve. Lines indicate the linear mixed-effects regression of principal curve position on the infant's age in months, while treating subject as a random effect. The shading indicates the 95% confidence interval. The vertical dashed lines indicate the age at which the infant line from each country crosses the adult average position for that country.

## Supplementary Figure 5

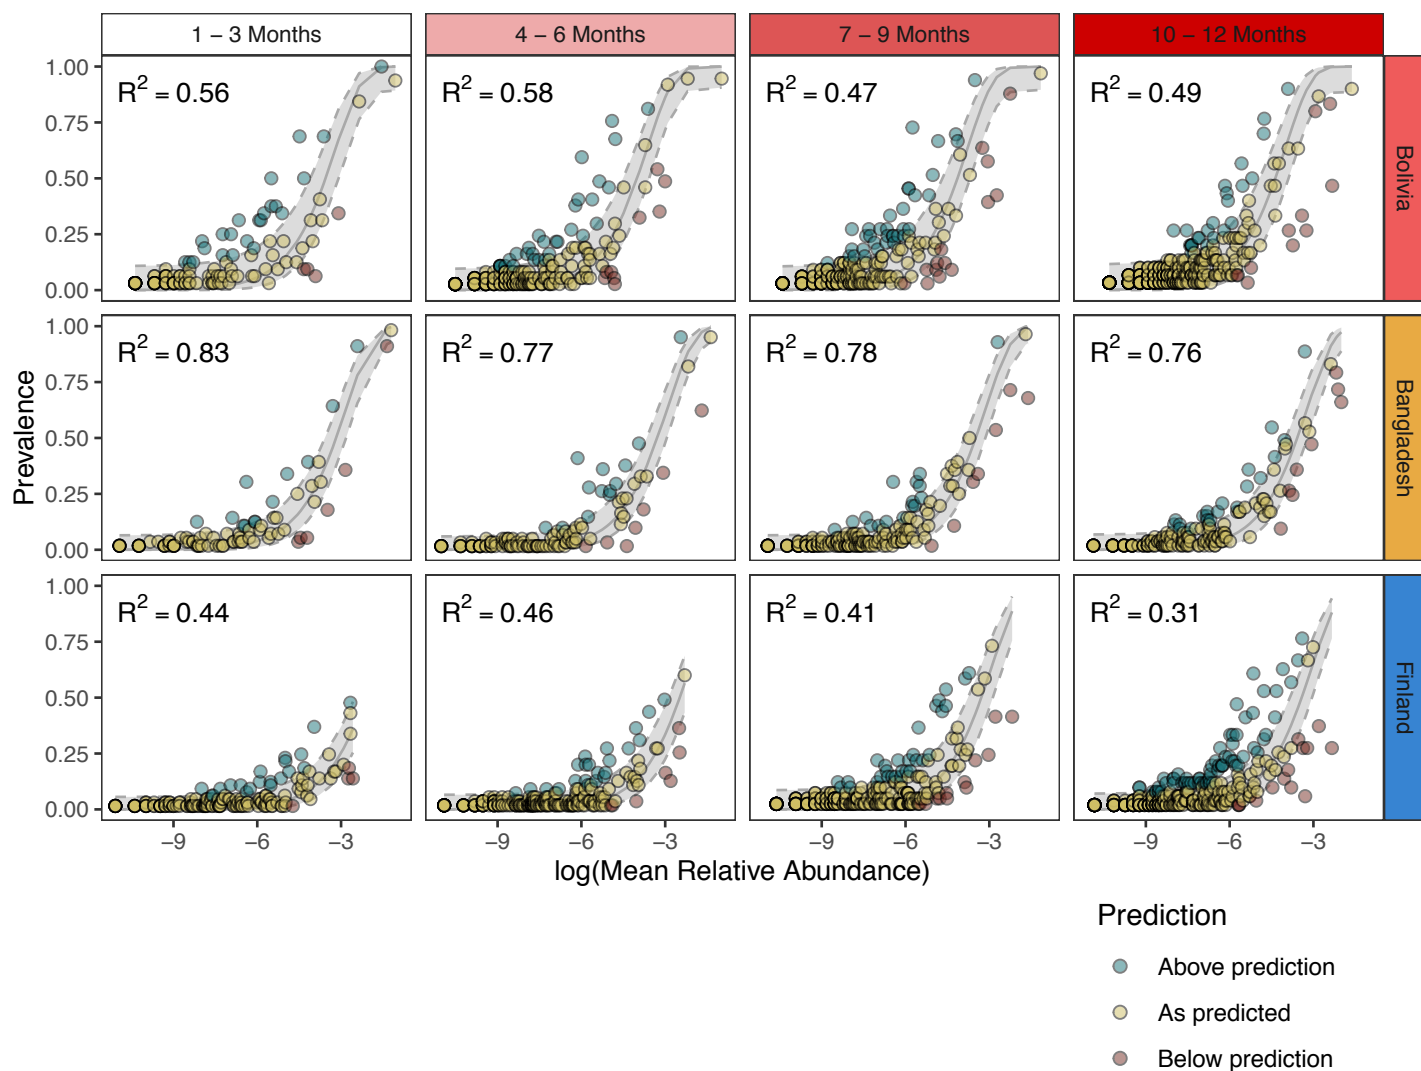

Supplementary Figure 5. **Neutral processes explain microbial community assembly across age groups and geography.** Scatterplot of the prevalence of each ASV in the infant gut versus its mean relative abundance in the regional species pool for each age group and country. The gray line is their predicted distribution (shaded area is 95% confidence interval) based on the neutral community model. Points are colored by the ASV's fit to the model: above prediction— green, below prediction— red, at prediction – yellow.

## Supplementary Figure 6

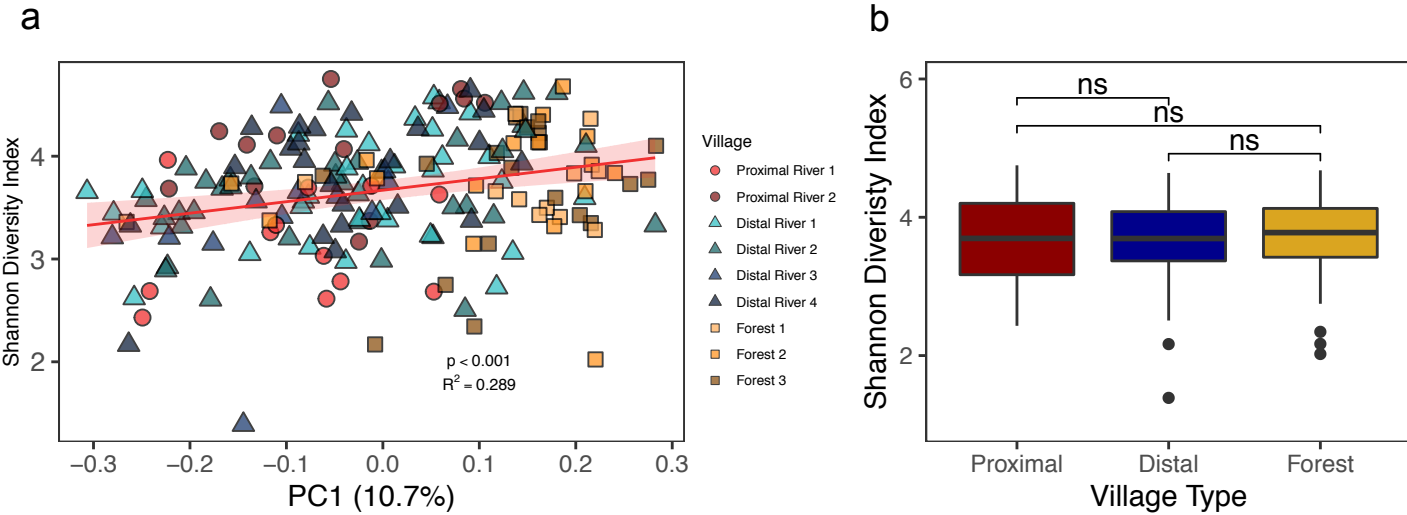

Supplementary Figure 6. **Gut microbiota diversity among Tsimane villages.** (a) Shannon Diversity Index plotted against the PC1 value from Fig. 5b ( $R^2 = 0.289$ ,  $p < 0.001$ ). The red line indicates the linear mixed-effects regression while treating subject as a random effect, and shading indicates the 95% confidence interval. The conditional  $R^2$  describes the proportion of the variation explained by both fixed and random factors. (b) Boxplot comparing the average diversity of adult stool microbiota of samples collected from proximal river, distal river, and forest Tsimane villages ( $p > 0.05$  for all comparisons).

## Supplementary Figure 7

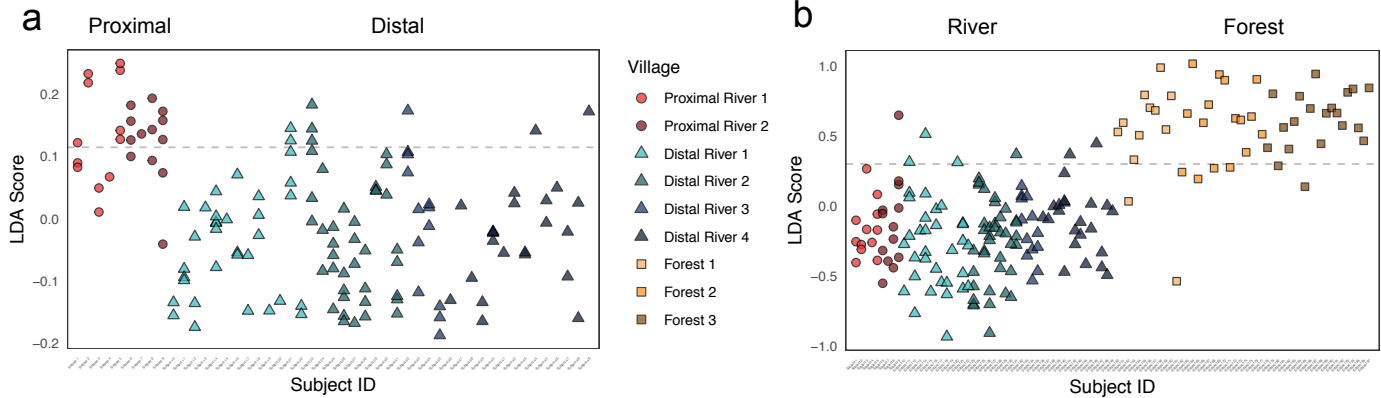

Supplementary Figure 7. **Bacterial taxa discriminate between village types.** (a) The LDA score of each adult stool sample was calculated from a phylogeny-based form of linear discriminant analysis (treeDA, version 0.0.3). Higher scores indicate samples more likely to have been collected from a proximal river village, while lower scores indicate samples more likely to have been collected from a distal river village. The dashed gray line represents the optimal LDA score cut-off between groups, where it accurately classifies 87.3% of samples. Samples are colored by village, and their shapes represent the village type (proximal river – circles, distal river – triangles, forest – squares). (b) The LDA score of each adult stool sample was calculated from a phylogeny-based form of linear discriminant analysis (treeDA, version 0.0.3). Higher scores indicate samples more likely from a forest village, while lower scores indicate samples more likely from a river village. The dashed gray line represents the optimal LDA score cut-off between groups, where it accurately classifies 91.8% of samples. The colors and shapes are the same as in panel a.

# Supplementary Table 1

| Village          | Age Class     | Number of Subjects | Stool Samples | Tongue Swabs | All Samples | Distance from City (Km) | Population* |
|------------------|---------------|--------------------|---------------|--------------|-------------|-------------------------|-------------|
| Proximal River 1 | <i>Adult</i>  | 6                  | 12            | 8            | 47          | 14.3                    | 331         |
|                  | <i>Child</i>  | 0                  | 0             | 0            |             |                         |             |
|                  | <i>Infant</i> | 6                  | 20            | 7            |             |                         |             |
| Proximal River 2 | <i>Adult</i>  | 4                  | 13            | 6            | 42          | 18.5                    | 292         |
|                  | <i>Child</i>  | 0                  | 0             | 0            |             |                         |             |
|                  | <i>Infant</i> | 4                  | 17            | 6            |             |                         |             |
| Distal River 1   | <i>Adult</i>  | 13                 | 34            | 13           | 92          | 29.8                    | 151         |
|                  | <i>Child</i>  | 0                  | 0             | 0            |             |                         |             |
|                  | <i>Infant</i> | 11                 | 33            | 12           |             |                         |             |
| Distal River 2   | <i>Adult</i>  | 9                  | 39            | 18           | 128         | 33.5                    | 253         |
|                  | <i>Child</i>  | 0                  | 0             | 0            |             |                         |             |
|                  | <i>Infant</i> | 10                 | 53            | 18           |             |                         |             |
| Distal River 3   | <i>Adult</i>  | 5                  | 13            | 5            | 36          | 37.5                    | 101         |
|                  | <i>Child</i>  | 0                  | 0             | 0            |             |                         |             |
|                  | <i>Infant</i> | 5                  | 14            | 4            |             |                         |             |
| Distal River 4   | <i>Adult</i>  | 14                 | 23            | 12           | 65          | 42.5                    | 206         |
|                  | <i>Child</i>  | 0                  | 0             | 0            |             |                         |             |
|                  | <i>Infant</i> | 12                 | 19            | 11           |             |                         |             |
| Forest 1         | <i>Adult</i>  | 12                 | 12            | 0            | 21          | 31                      | 61          |
|                  | <i>Child</i>  | 8                  | 8             | 0            |             |                         |             |
|                  | <i>Infant</i> | 1                  | 1             | 0            |             |                         |             |
| Forest 2         | <i>Adult</i>  | 16                 | 16            | 0            | 27          | 61                      | 114         |
|                  | <i>Child</i>  | 11                 | 11            | 0            |             |                         |             |
|                  | <i>Infant</i> | 0                  | 0             | 0            |             |                         |             |
| Forest 3         | <i>Adult</i>  | 20                 | 20            | 0            | 25          | 68                      | 101         |
|                  | <i>Child</i>  | 5                  | 5             | 0            |             |                         |             |
|                  | <i>Infant</i> | 0                  | 0             | 0            |             |                         |             |

**Supplementary Table 1. Demographics of Tsimane villages and study subjects**

Villages are listed in order of increasing distance from the closest market town. Age classes are defined as Infant – under 2 years, Child – 2 to 13 years old, Adult – 14 years old and older. The 73 fecal samples collected from forest communities were collected in July 2009, while the remaining fecal and oral samples from proximal and distal river communities were collected between September 2012 and March 2013. \*Population sizes for forest villages were collected during a 2009 census, while the remaining were collected in a 2012 census.
